# Supplementary material for: Phenylalanine and Tryptophan-Based Surfactants as New Antibacterial Agents: Characterization, Self-Aggregation Properties, and DPPC/Surfactants Vesicles Formulation
Source: MDPI journal article supplement (doi:10.3390/pharmaceutics15071856), 2023-06-30
Supplement: s1 [file pharmaceutics-2426192-supplementary.pdf › pharmaceutics-2426192-supplementary.pdf]

## ELECTRONIC SUPPLEMENTARY INFORMATION

### Phenylalanine and Tryptophan-based surfactants as new antibacterial agents: characterization, self-aggregation properties, and DPPC/Surfactants vesicles formulation

Zakaria Hafidi<sup>1,2</sup>, Lourdes Pérez<sup>1\*</sup>, Mohammed El Achouri<sup>2,3</sup>, Ramon Pons<sup>1\*</sup>

<sup>1</sup>Department of Surfactants and Nanobiotechnology, IQAC-CSIC, Barcelona, Spain

<sup>2</sup>Laboratoire de physico-chimie des matériaux inorganiques et organiques, Centre des Sciences des Matériaux, Ecole Normale supérieure-Rabat, Mohammed V University in Rabat, Rabat, Morocco

<sup>3</sup> Centre des Sciences et Technologies de la Formulation

## CONTENT

### Figures

**Figure. S1:** <sup>1</sup>H NMR spectrum of C<sub>8</sub>TC<sub>3</sub>NH<sub>3</sub>C

**Figure. S2:** <sup>13</sup>C NMR spectrum of C<sub>8</sub>TC<sub>3</sub>NH<sub>3</sub>Cl

**Figure. S3:** ESI-MS spectrum of C<sub>8</sub>TC<sub>3</sub>NH<sub>3</sub>Cl

**Figure. S4:** <sup>1</sup>H NMR spectrum of C<sub>10</sub>TC<sub>3</sub>NH<sub>3</sub>C

**Figure. S5:** <sup>13</sup>C NMR spectrum of C<sub>10</sub>TC<sub>3</sub>NH<sub>3</sub>C

**Figure. S6:** ESI-MS spectrum of C<sub>10</sub>TC<sub>3</sub>NH<sub>3</sub>Cl

**Figure. S7:** <sup>1</sup>H NMR spectrum of C<sub>12</sub>TC<sub>3</sub>NH<sub>3</sub>C

**Figure. S8:** <sup>1</sup>H NMR spectrum of C<sub>12</sub>TC<sub>3</sub>NH

**Figure. S9:** ESI-MS spectrum of C<sub>12</sub>TC<sub>3</sub>NH<sub>3</sub>Cl

**Figure. S10:** <sup>1</sup>H NMR spectrum of C<sub>14</sub>TC<sub>3</sub>NH<sub>3</sub>C

**Figure. S11:** <sup>13</sup>C NMR spectrum of C<sub>12</sub>TC<sub>3</sub>NH

**Figure. S12:** ESI-MS spectrum of C<sub>14</sub>TC<sub>3</sub>NH<sub>3</sub>Cl

**Figure. S13:** <sup>1</sup>H NMR spectrum of C<sub>10</sub>PC<sub>3</sub>NH<sub>3</sub>C

**Figure. S14:** <sup>13</sup>C NMR spectrum of C<sub>10</sub>PC<sub>3</sub>NH<sub>3</sub>C

**Figure. S15:** ESI-MS spectrum of C<sub>10</sub>PC<sub>3</sub>NH<sub>3</sub>C

**Figure. S16:** <sup>1</sup>H NMR spectrum of C<sub>12</sub>PC<sub>3</sub>NH<sub>3</sub>C

**Figure. S17:** <sup>13</sup>C NMR spectrum of C<sub>12</sub>PC<sub>3</sub>NH<sub>3</sub>C

**Figure. S18:** ESI-MS spectrum of C<sub>12</sub>PC<sub>3</sub>NH<sub>3</sub>C

**Figure. S19:** <sup>1</sup>H NMR spectrum of C<sub>14</sub>PC<sub>3</sub>NH<sub>3</sub>C

**Figure. S20:**  $^{13}\text{C}$  NMR spectrum of  $\text{C}_{14}\text{PC}_3\text{NH}_3\text{Cl}$

**Figure. S21:** ESI-MS spectrum of  $\text{C}_{14}\text{PC}_3\text{NH}_3\text{Cl}$

**Figure.S22** NaOH titration and HCl back titration at 298.15 K for  $\text{C}_8\text{TC}_3\text{NH}_3\text{Cl}$

**Figure.S23** NaOH titration and HCl back titration at 298.15 K for  $\text{C}_{10}\text{TC}_3\text{NH}_3\text{Cl}$

**Figure.S24** NaOH titration and HCl back titration at 298.15 K for  $\text{C}_{12}\text{TC}_3\text{NH}_3\text{Cl}$

**Figure.S25** NaOH titration and HCl back titration at 298.15 K for  $\text{C}_{14}\text{TC}_3\text{NH}_3\text{Cl}$

**Figure.S26** NaOH titration and HCl back titration at 298.15 K for  $\text{C}_{10}\text{PC}_3\text{NH}_3\text{Cl}$

**Figure.S27** NaOH titration and HCl back titration at 298.15 K for  $\text{C}_{12}\text{PC}_3\text{NH}_3\text{Cl}$

**Figure.S28** NaOH titration and HCl back titration at 298.15 K for  $\text{C}_{14}\text{PC}_3\text{NH}_3\text{Cl}$

**Figure.S29** Specific conductivity ( $\kappa$ ) as a function of  $\text{C}_{10}\text{TC}_3\text{NH}_3\text{Cl}$  concentration

**Figure.S30** Specific conductivity ( $\kappa$ ) as a function of  $\text{C}_{12}\text{TC}_3\text{NH}_3\text{Cl}$  concentration

**Figure.S31** Specific conductivity ( $\kappa$ ) as a function of  $\text{C}_{14}\text{TC}_3\text{NH}_3\text{Cl}$  concentration

**Figure.S32** Specific conductivity ( $\kappa$ ) as a function of  $\text{C}_{10}\text{PC}_3\text{NH}_3\text{Cl}$  concentration

**Figure.S33** Specific conductivity ( $\kappa$ ) as a function of  $\text{C}_{12}\text{PC}_3\text{NH}_3\text{Cl}$  concentration

**Figure.S34** Specific conductivity ( $\kappa$ ) as a function of  $\text{C}_{14}\text{PC}_3\text{NH}_3\text{Cl}$  concentration

**Figure.S35** Variation of  $I_1/I_3$  ratio of pyrene fluorescence as a function of  $\text{C}_8\text{TC}_3\text{NH}_3\text{Cl}$  concentration

**Figure.S36** Variation of  $I_1/I_3$  ratio of pyrene fluorescence as a function of  $\text{C}_{10}\text{TC}_3\text{NH}_3\text{Cl}$  concentration

**Figure.S37** Variation of  $I_1/I_3$  ratio of pyrene fluorescence as a function of  $\text{C}_{12}\text{TC}_3\text{NH}_3\text{Cl}$  concentration

**Figure.S38** Variation of  $I_1/I_3$  ratio of pyrene fluorescence as a function of  $\text{C}_{14}\text{TC}_3\text{NH}_3\text{Cl}$  concentration

**Figure.S39** Variation of  $I_1/I_3$  ratio of pyrene fluorescence as a function of  $\text{C}_{14}\text{PC}_3\text{NH}_3\text{Cl}$  concentration

**Figure.S40** Variation of  $I_1/I_3$  ratio of pyrene fluorescence as a function of  $\text{C}_{12}\text{PC}_3\text{NH}_3\text{Cl}$  concentration

**Figure.S41** Variation of  $I_1/I_3$  ratio of pyrene fluorescence as a function of  $\text{C}_{14}\text{PC}_3\text{NH}_3\text{Cl}$  concentration

**Figure.S42** A) Scattered intensity patterns as a function of scattering vector modulus for DPPC and  $\text{C}_{12}\text{PC}_3\text{NH}_3\text{Cl}$  and their mixtures the curves correspond to the best fit of Gaussian bilayers or core-shell models. B) The corresponding electron density profiles of the bilayer models corresponding to the best fits of A).

**Figure.S43** A) Scattered intensity patterns as a function of scattering vector modulus for DPPC and  $\text{C}_{14}\text{PC}_3\text{NH}_3\text{Cl}$  and their mixtures the curves correspond to the best fit of Gaussian bilayers or core-shell models. B) The corresponding electron density profiles of the bilayer models corresponding to the best fits of A).

**Figure.S44.** the core-shell model vesicle model

**Figure. S45.** Hemolysis (%) as a function of surfactants concentration.

**Figure S46:** Three-dimensional (3 D) closest interactions between active site residues of peptidoglycan glycosyltransferase (PDB ID:2OQO) With CnBenzalkonium (From C<sub>8</sub> to C<sub>14</sub> carbon atoms) derivatives.

## Tables

**Table S1** Fitting parameters of Gaussian bilayers for DPPC/C<sub>12</sub>PC<sub>3</sub>NH<sub>3</sub>Cl mixtures.

**Table S2** Fitting parameters of Gaussian bilayers for DPPC/C<sub>14</sub>PC<sub>3</sub>NH<sub>3</sub>Cl mixtures

**Table S3** Hemolytic activity of tryptophan and phenylalanine-based surfactants

**Table S4** Results of the interaction details and docking score in (kcal/mol) of Benzalkonium derivative (From C<sub>8</sub> to C<sub>14</sub> carbon atoms) against the peptidoglycan glycosyltransferase (PDB ID:2OQO).

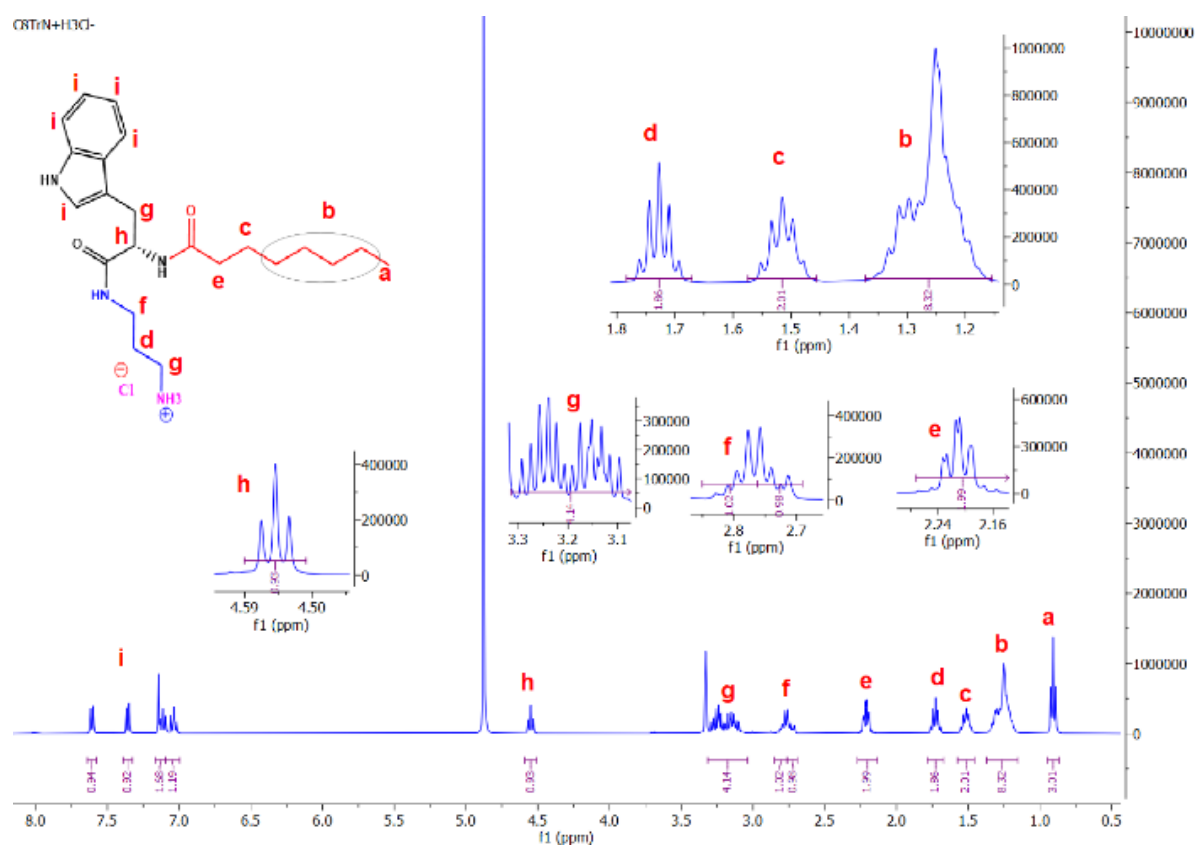

**Figure. S1:**  $^1\text{H}$  NMR spectrum of  $\text{C}_8\text{TC}_3\text{NH}_3\text{C}$

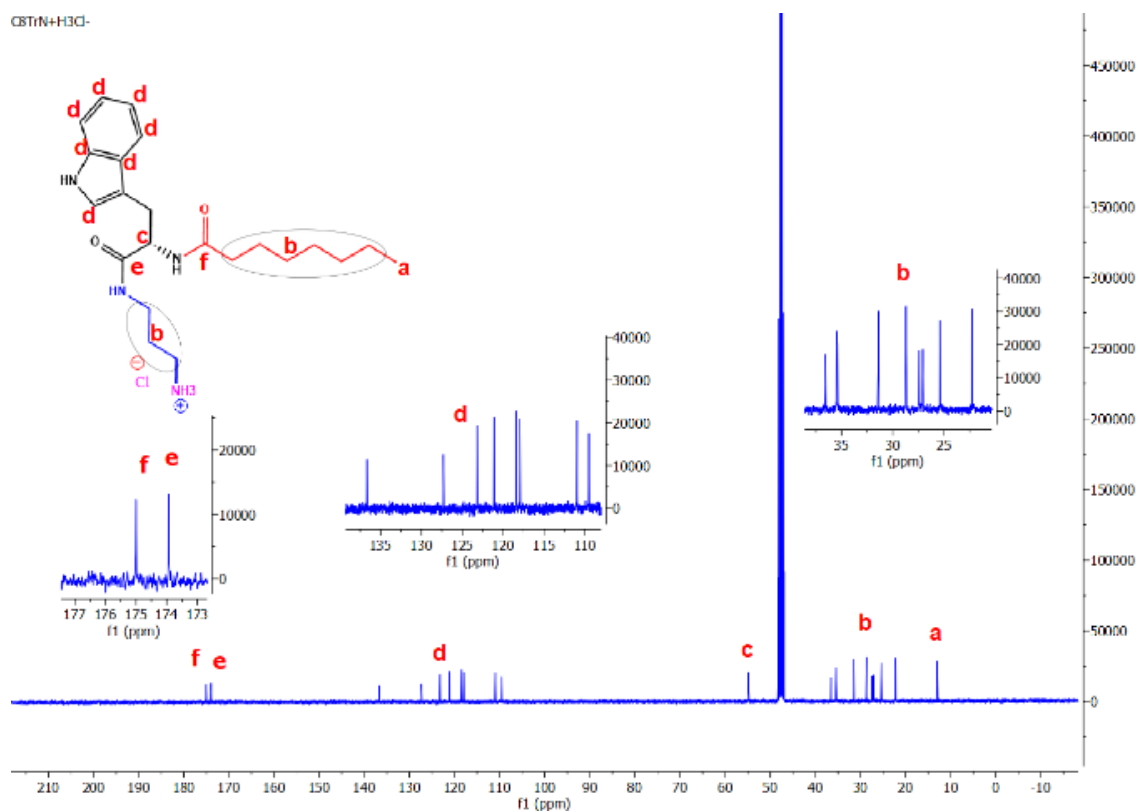

**Figure. S2:**  $^{13}\text{C}$  NMR spectrum of  $\text{C}_8\text{TC}_3\text{NH}_3\text{Cl}$

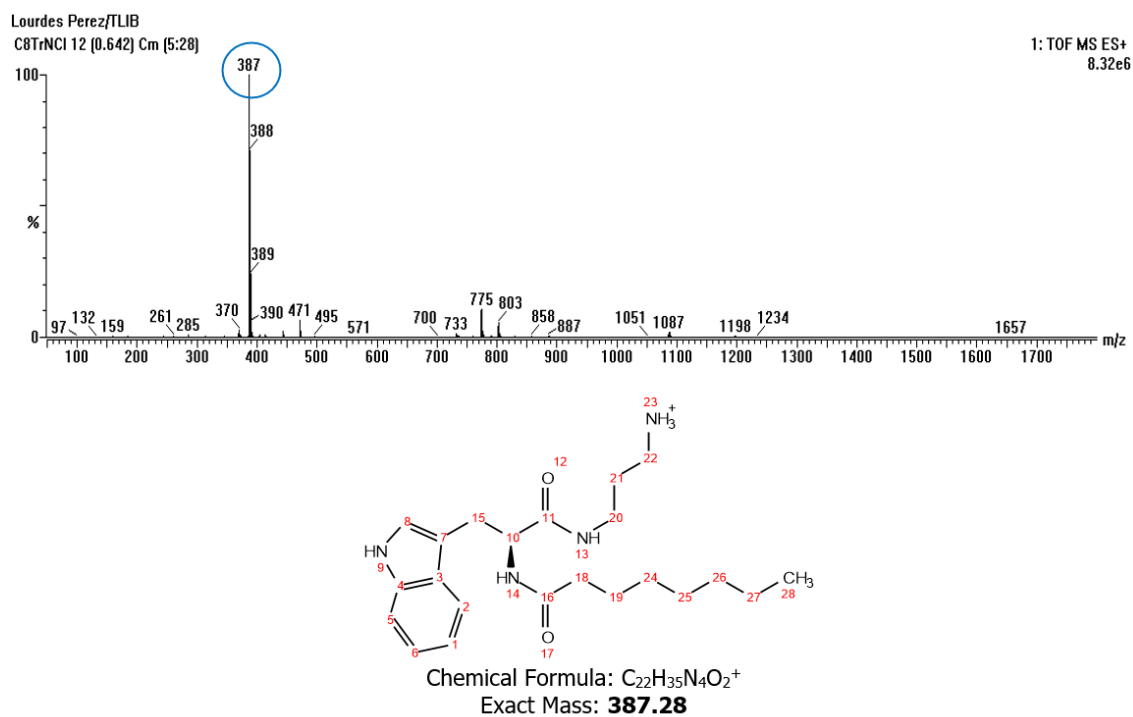

**Figure. S3:** ESI-MS spectrum of  $\text{C}_8\text{TC}_3\text{NH}_3\text{Cl}$

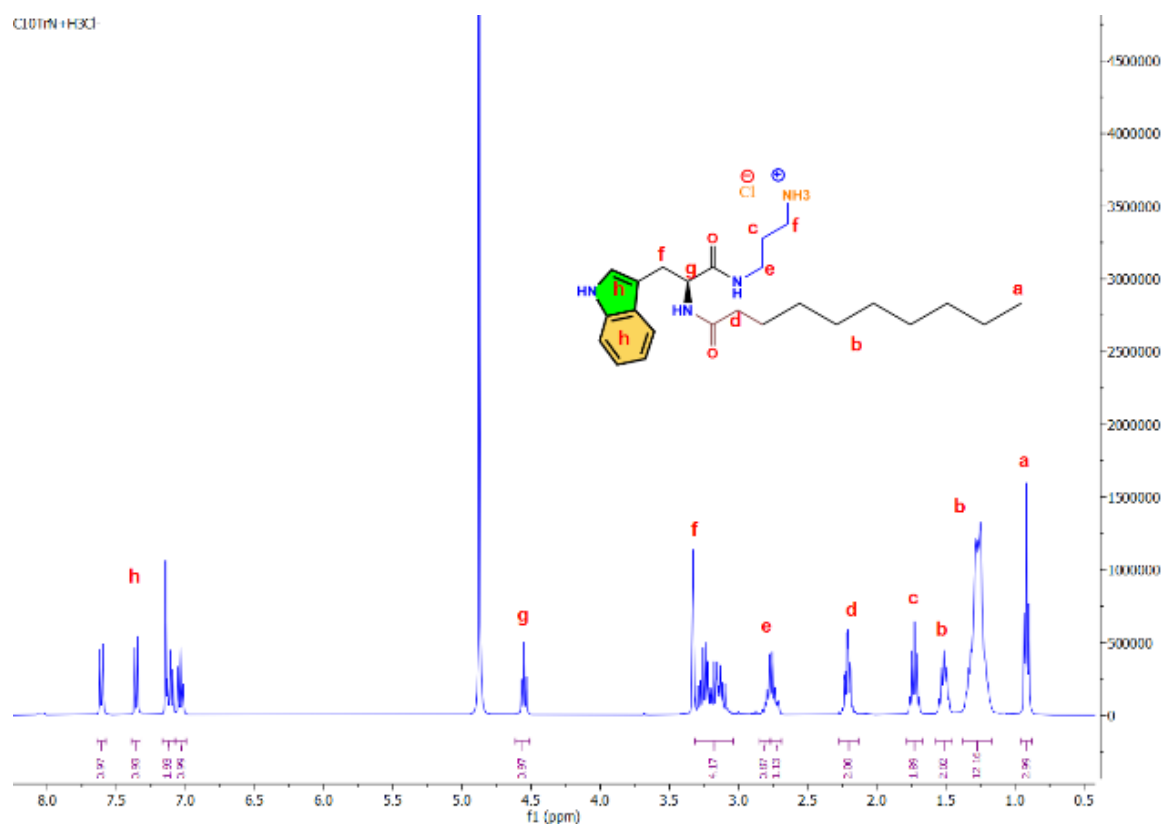

**Figure. S4:**  $^1H$  NMR spectrum of  $C_{10}TC_3NH_3C$

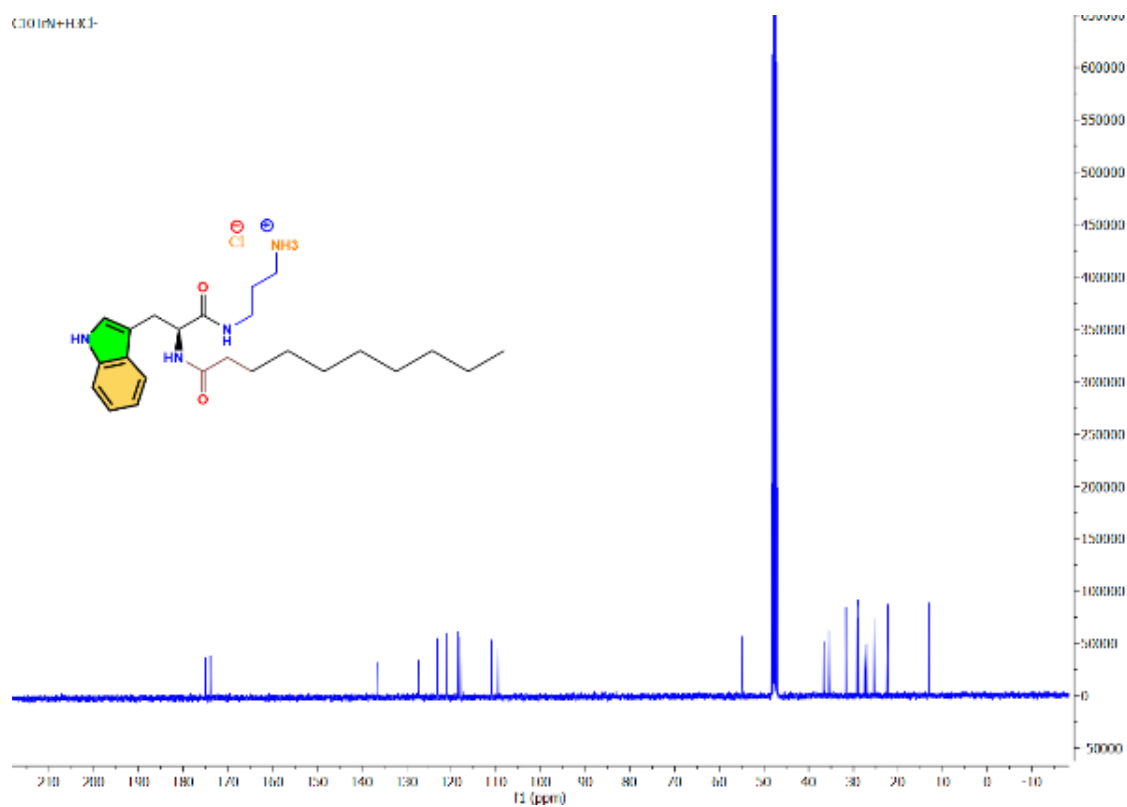

**Figure. S5**  $^{13}\text{C}$  NMR spectrum of  $\text{C}_{10}\text{TC}_3\text{NH}_3\text{C}$

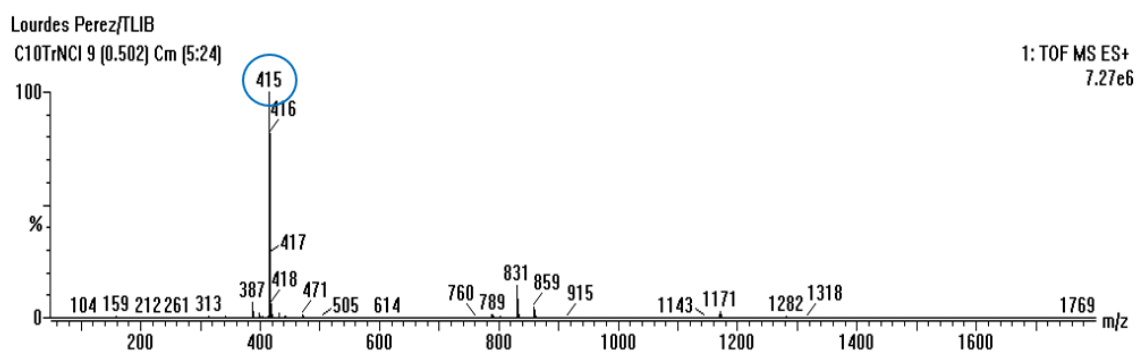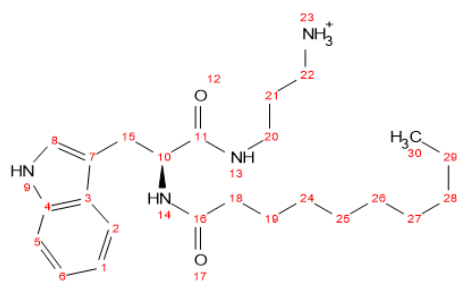

Chemical Formula:  $\text{C}_{24}\text{H}_{39}\text{N}_4\text{O}_2^+$

Exact Mass: **415.31**

**Figure. S6:** ESI-MS spectrum of  $\text{C}_{10}\text{TC}_3\text{NH}_3\text{Cl}$

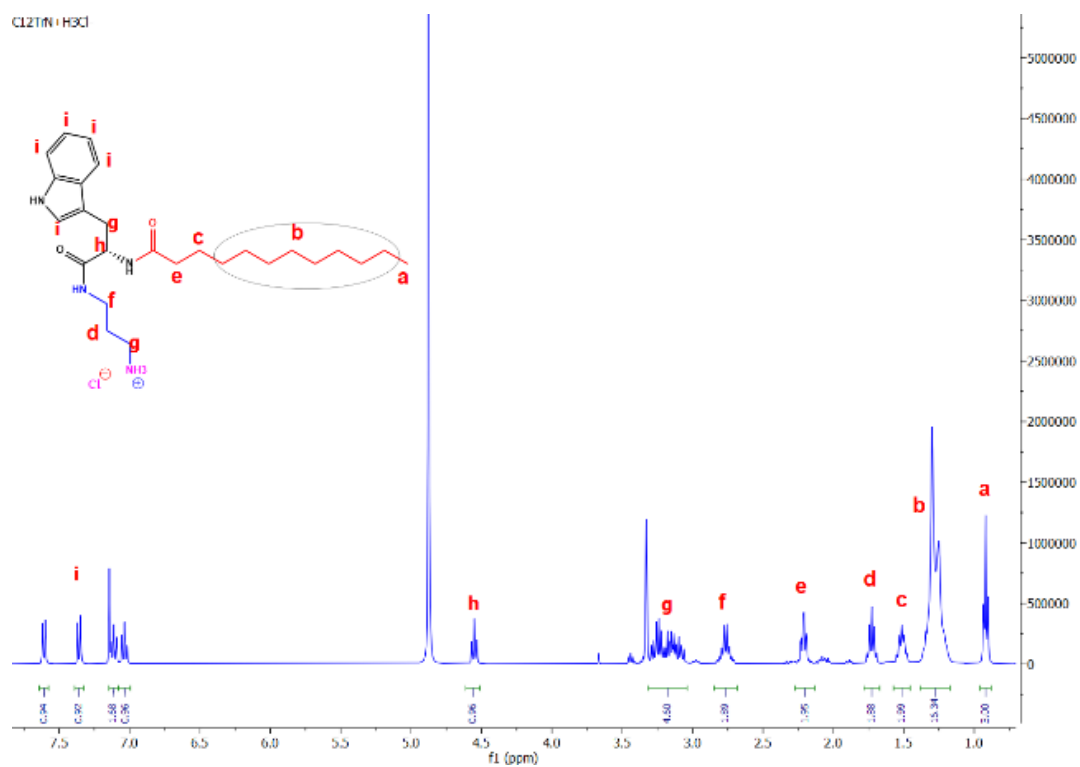

**Figure. S7:**  $^1H$  NMR spectrum of  $C_{12}TC_3NH_3C$

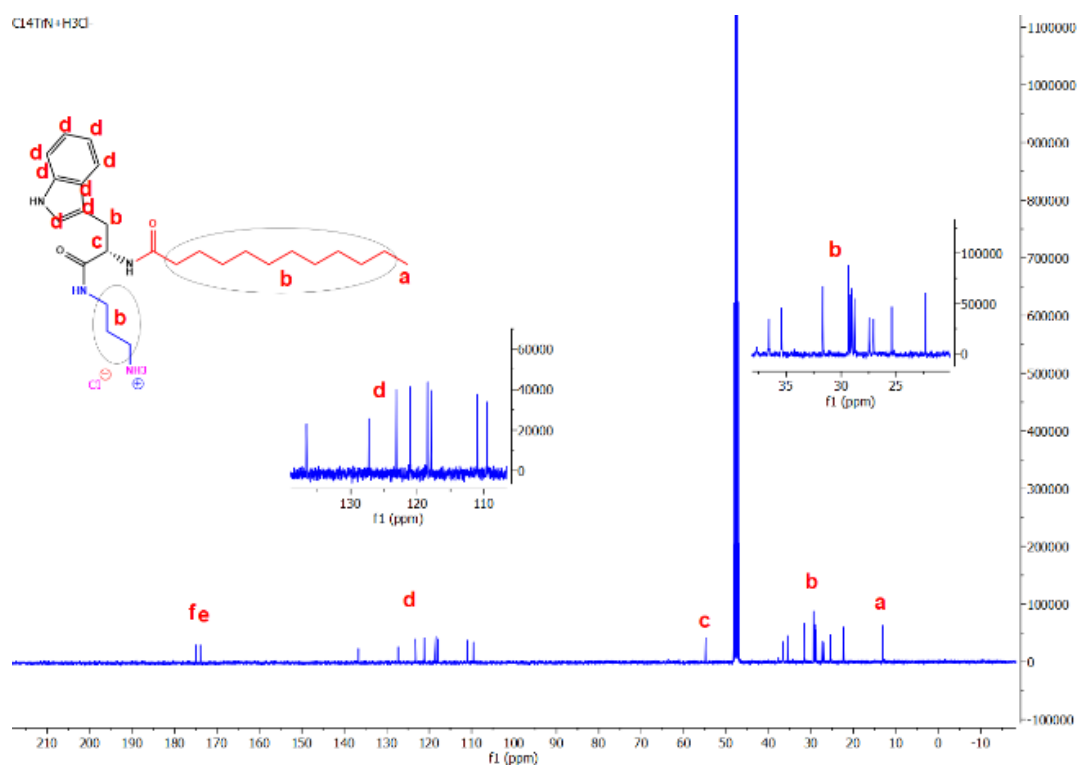

**Figure. S8:**  $^1H$  NMR spectrum of  $C_{12}TC_3NH$



Lourdes Perez/TLIB  
C12TrnCl 12 [0.634] Cm [3:32]

1: TOF MS ES+  
8.53e6

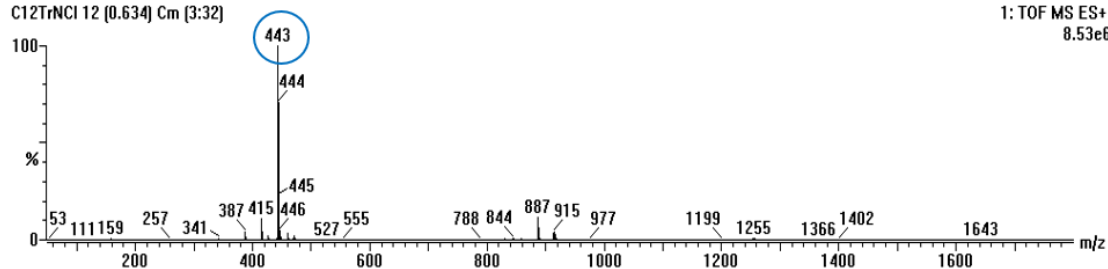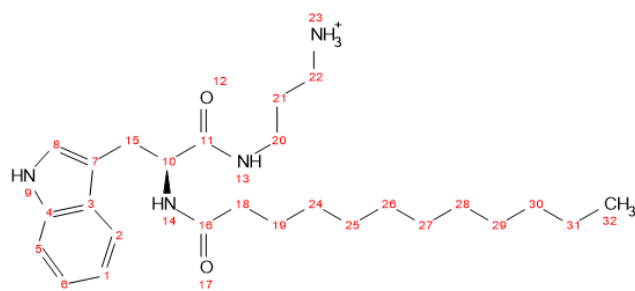

Chemical Formula: C<sub>26</sub>H<sub>43</sub>N<sub>4</sub>O<sub>2</sub><sup>+</sup>

Exact Mass: **443.34**

**Figure. S9:** ESI-MS spectrum of C<sub>12</sub>TC<sub>3</sub>NH<sub>3</sub>Cl

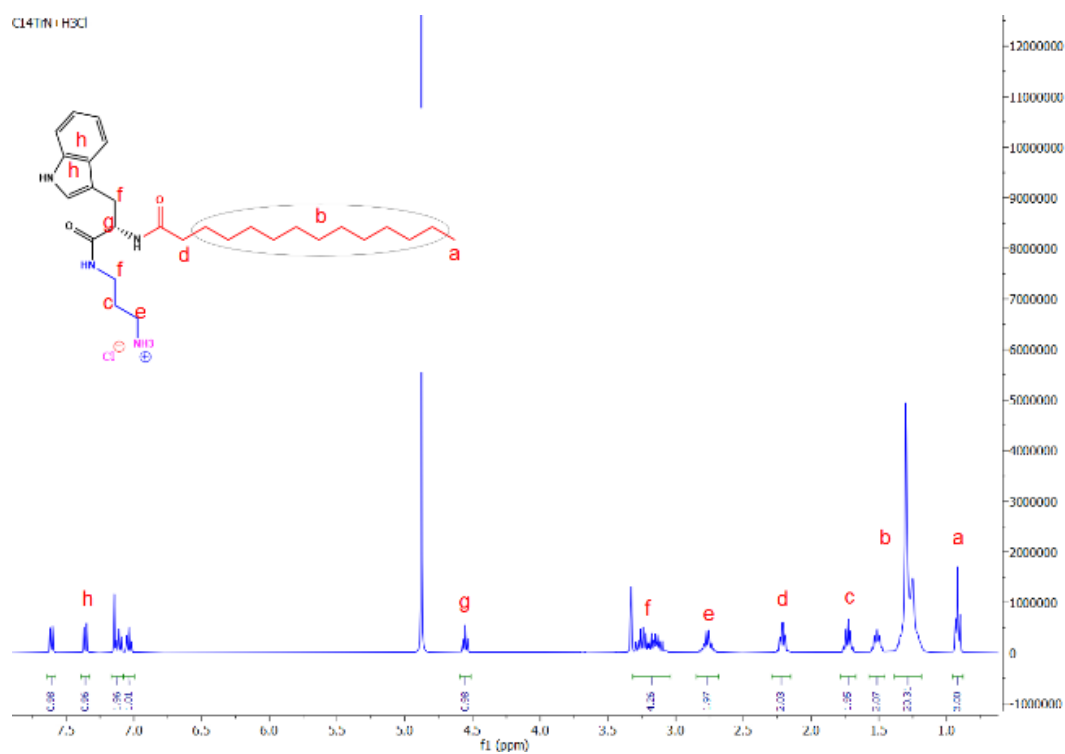

**Figure. S10:** <sup>1</sup>H NMR spectrum of C<sub>14</sub>TC<sub>3</sub>NH<sub>3</sub>C

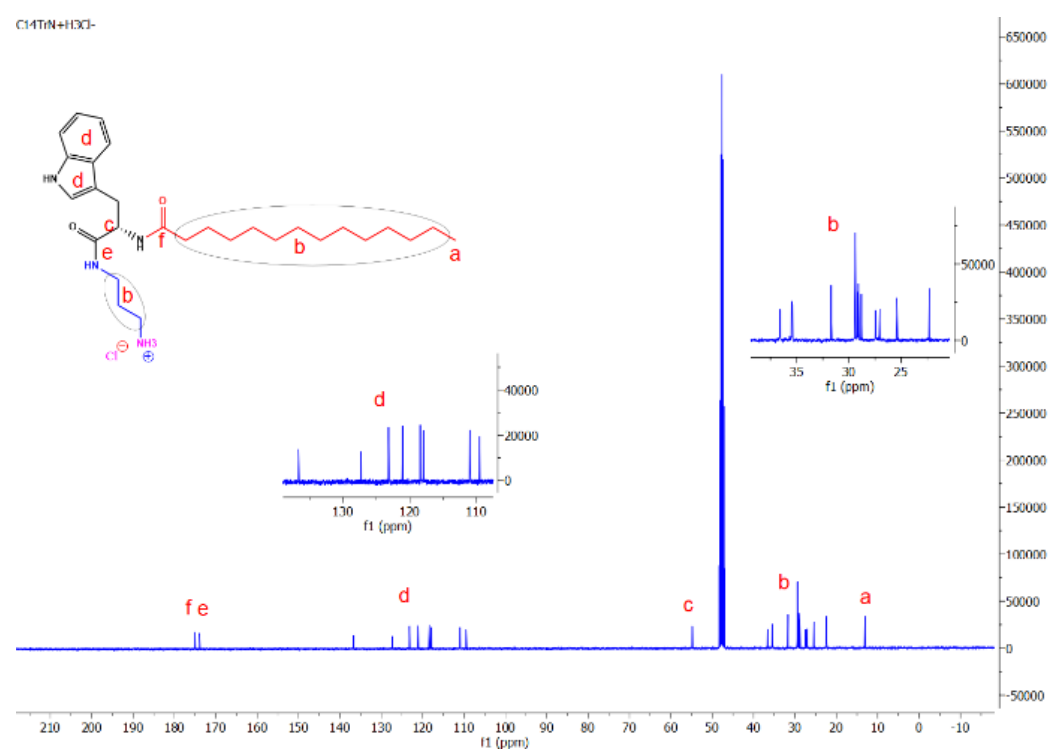

**Figure. S11:** <sup>13</sup>C NMR spectrum of C<sub>12</sub>TC<sub>3</sub>NH

Lourdes Perez/TLIB  
C14TrNCI 9 [0.501] Cm [5:31]

1: TOF MS ES+  
8.78e6

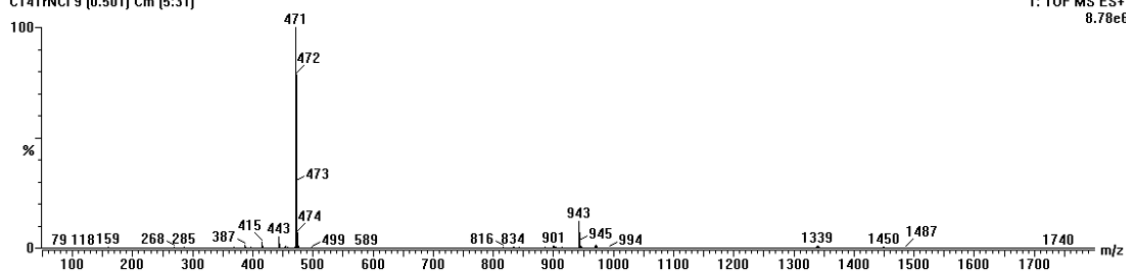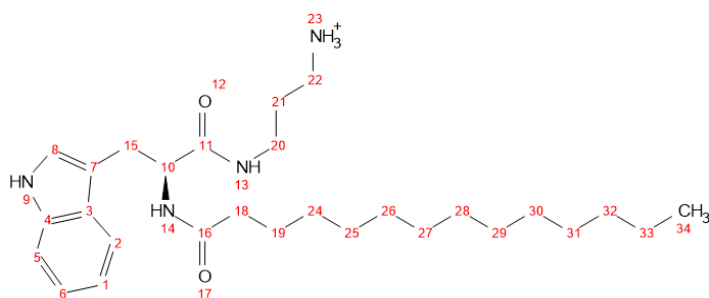

Chemical Formula:  $C_{28}H_{47}N_4O_2^+$

Exact Mass: **471.37**

**Figure. S12:** ESI-MS spectrum of  $C_{14}TC_3NH_3Cl$

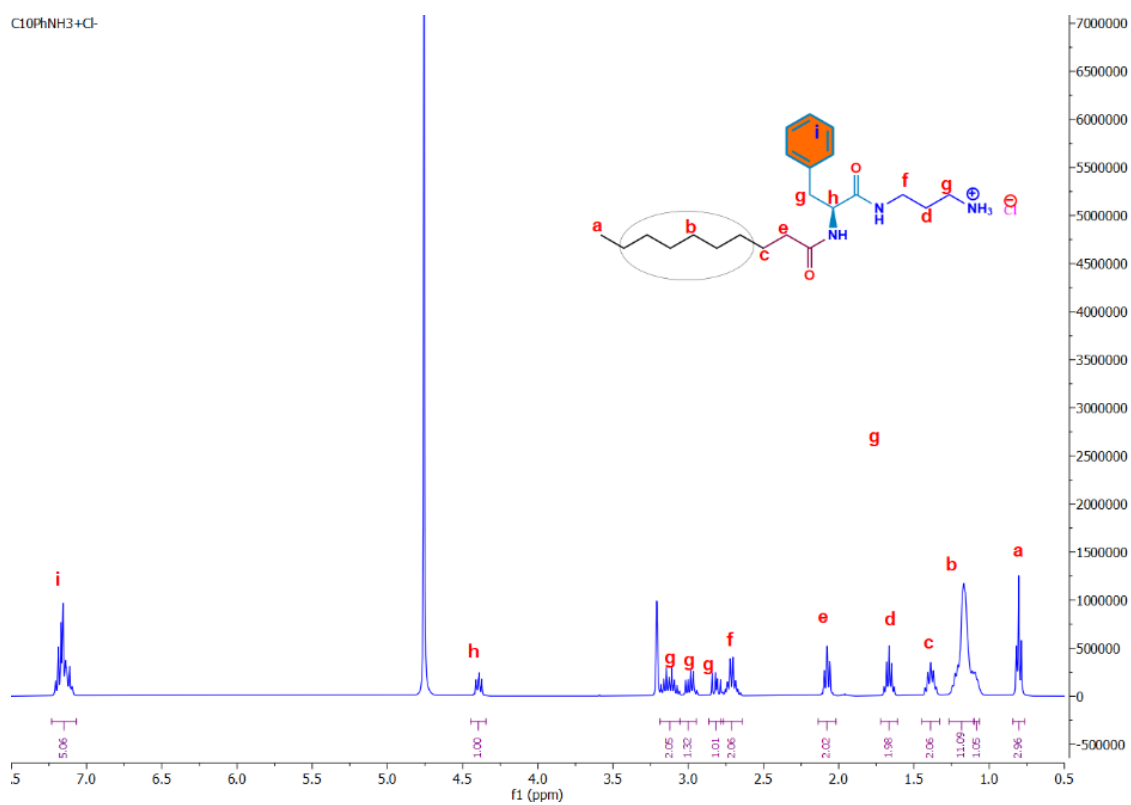

**Figure. S13:**  $^1\text{H}$  NMR spectrum of  $\text{C}_{10}\text{PC}_3\text{NH}_3\text{C}$

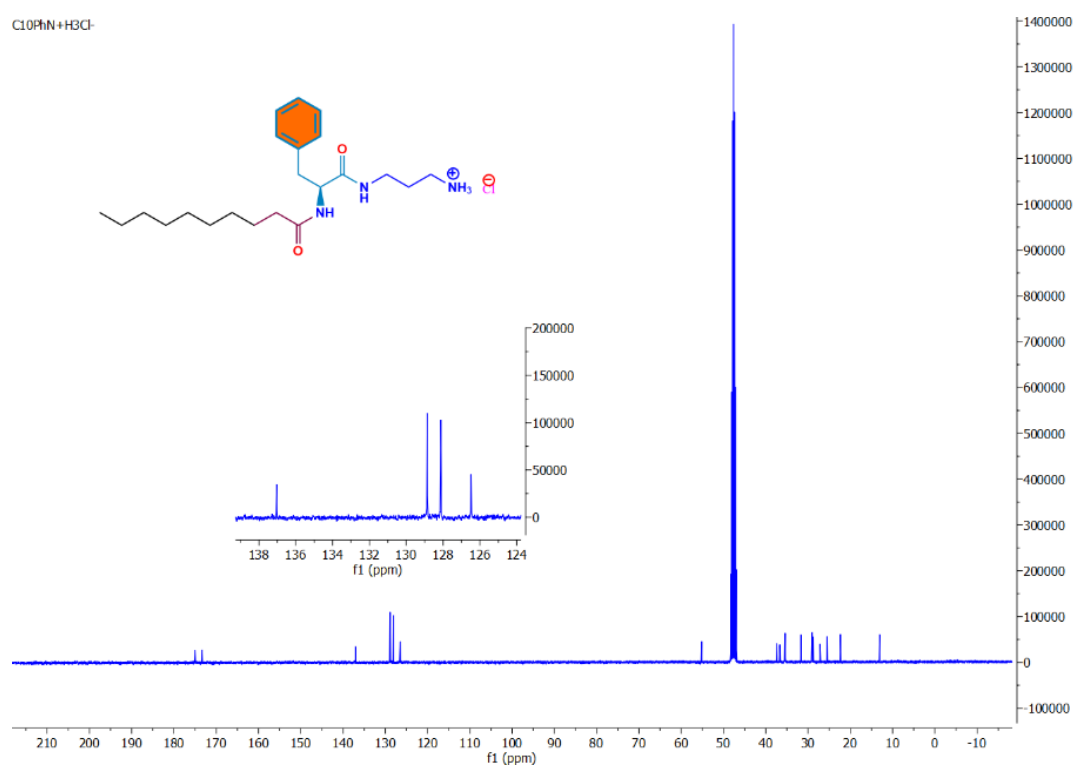

**Figure. S14:**  $^{13}\text{C}$  NMR spectrum of  $\text{C}_{10}\text{PC}_3\text{NH}_3\text{C}$

Lordes/TLIB

Lourdes\_C10PC3CL 10 (0.545) Cm (7:16)

1: TOF MS ES+  
4.35e6

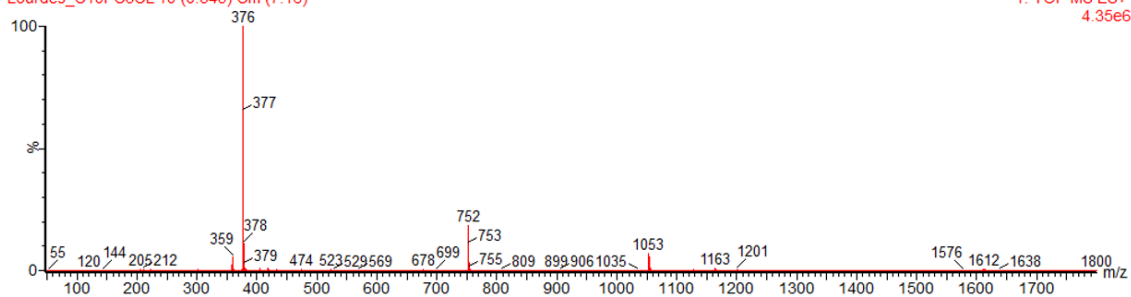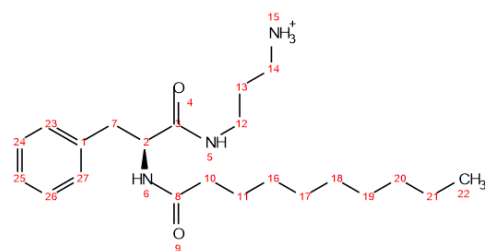

Chemical Formula:  $C_{22}H_{38}N_3O_2^+$

Exact Mass: **376.30**

**Figure. S15:** ESI-MS spectrum of  $C_{10}PC_3NH_3C$

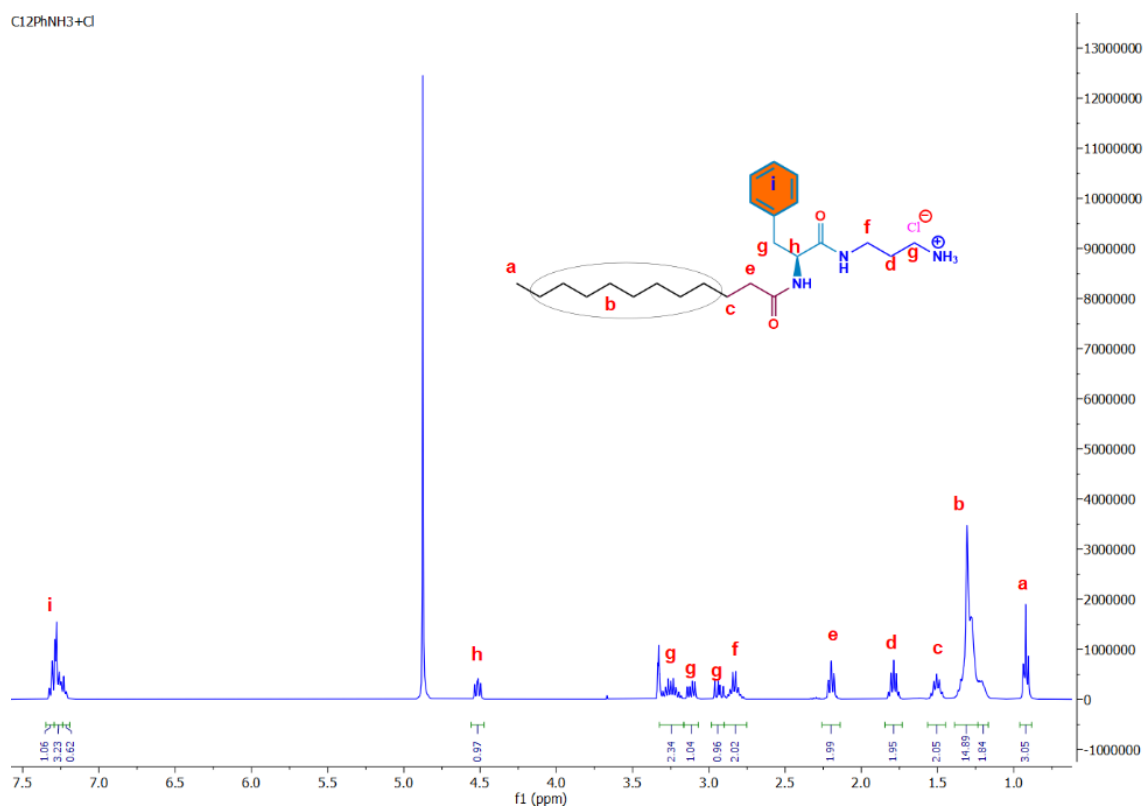

**Figure. S16:**  $^1\text{H}$  NMR spectrum of  $\text{C}_{12}\text{PC}_3\text{NH}_3\text{C}$

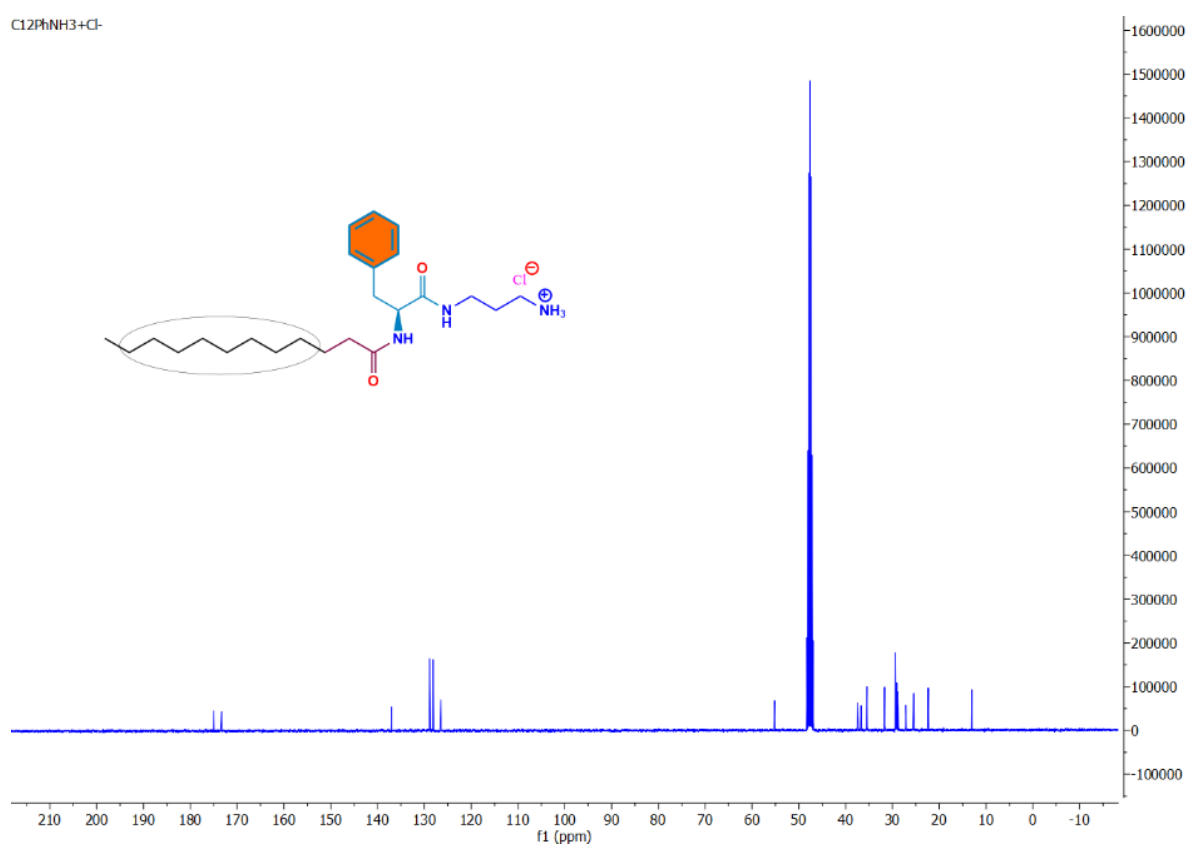

**Figure. S17:**  $^{13}\text{C}$  NMR spectrum of  $\text{C}_{12}\text{PC}_3\text{NH}_3\text{C}$

Lordes/TLIB

Lourdes\_C12PC3CL 10 (0.545) Cm (7:16)

1: TOF MS ES+  
4.61e6

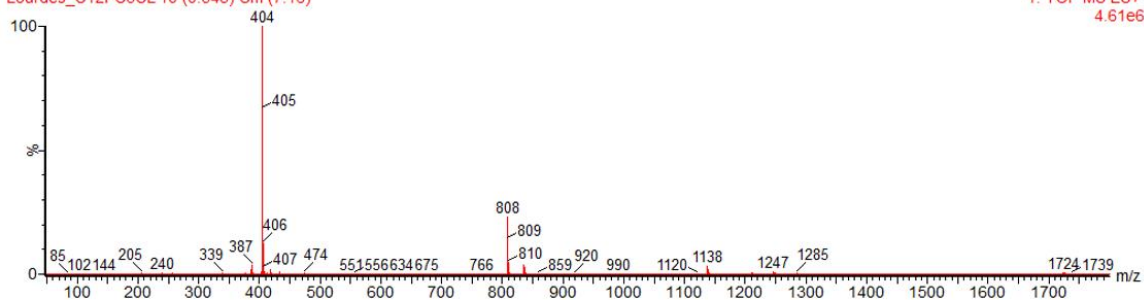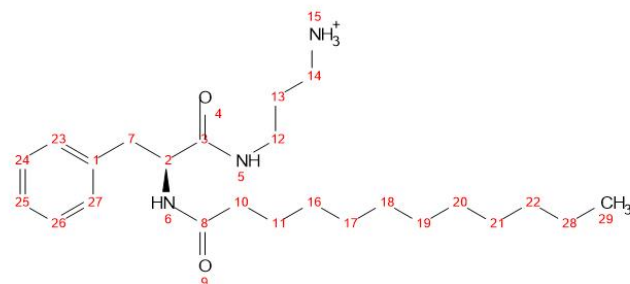

Chemical Formula: C<sub>24</sub>H<sub>42</sub>N<sub>3</sub>O<sub>2</sub><sup>+</sup>

Exact Mass: 404.33

**Figure. S18:** ESI-MS spectrum of C<sub>12</sub>PC<sub>3</sub>NH<sub>3</sub>C

C14PC3CL10.fid  
C14PC3CL-LP640PN-igac\_proton  
igac\_proton MeOD /opt/nmrdata/LP640PN LP640PN 41

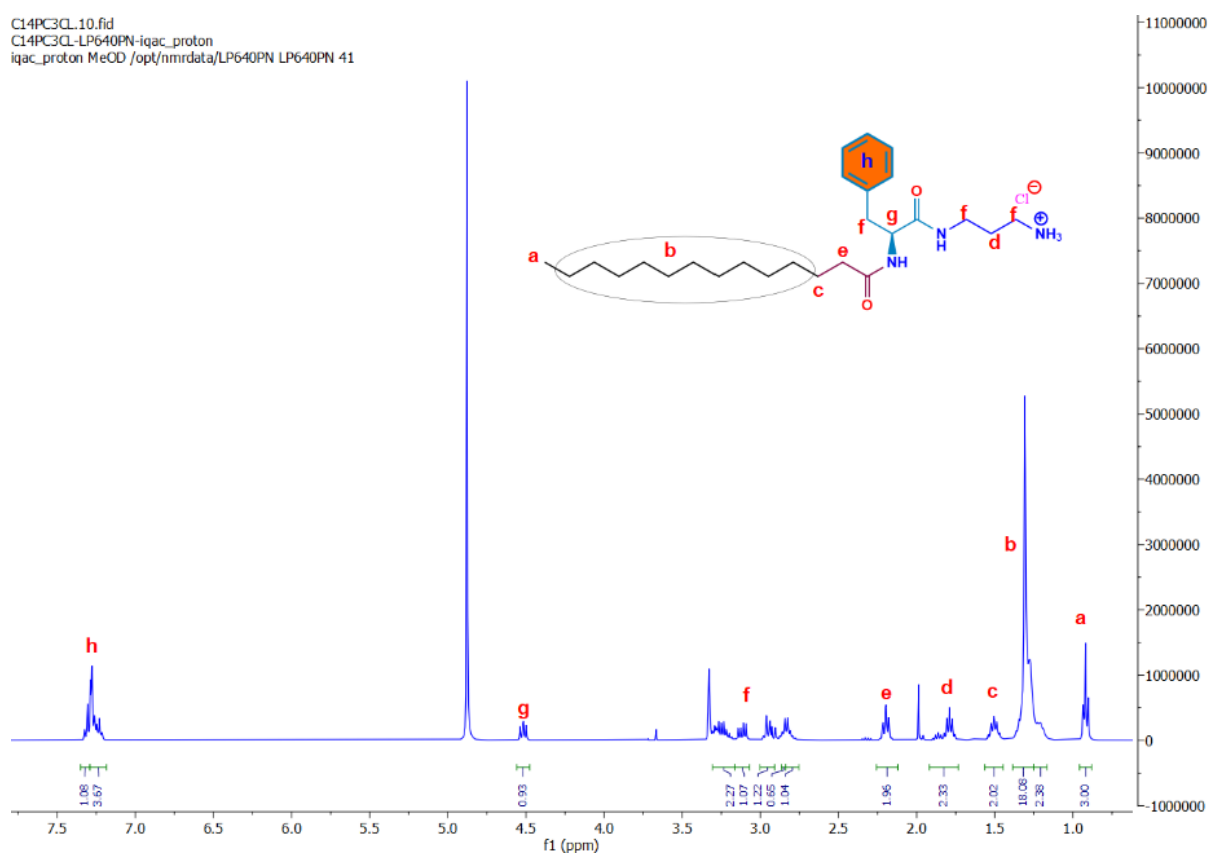

**Figure. S19:**  $^1\text{H}$  NMR spectrum of C<sub>14</sub>PC<sub>3</sub>NH<sub>3</sub>C

C14PC3CL11.fid  
C14PC3CL-LP640PN-igac\_C13CPD  
igac\_C13CPD MeOD /opt/nmrdata/LP640PN LP640PN 41

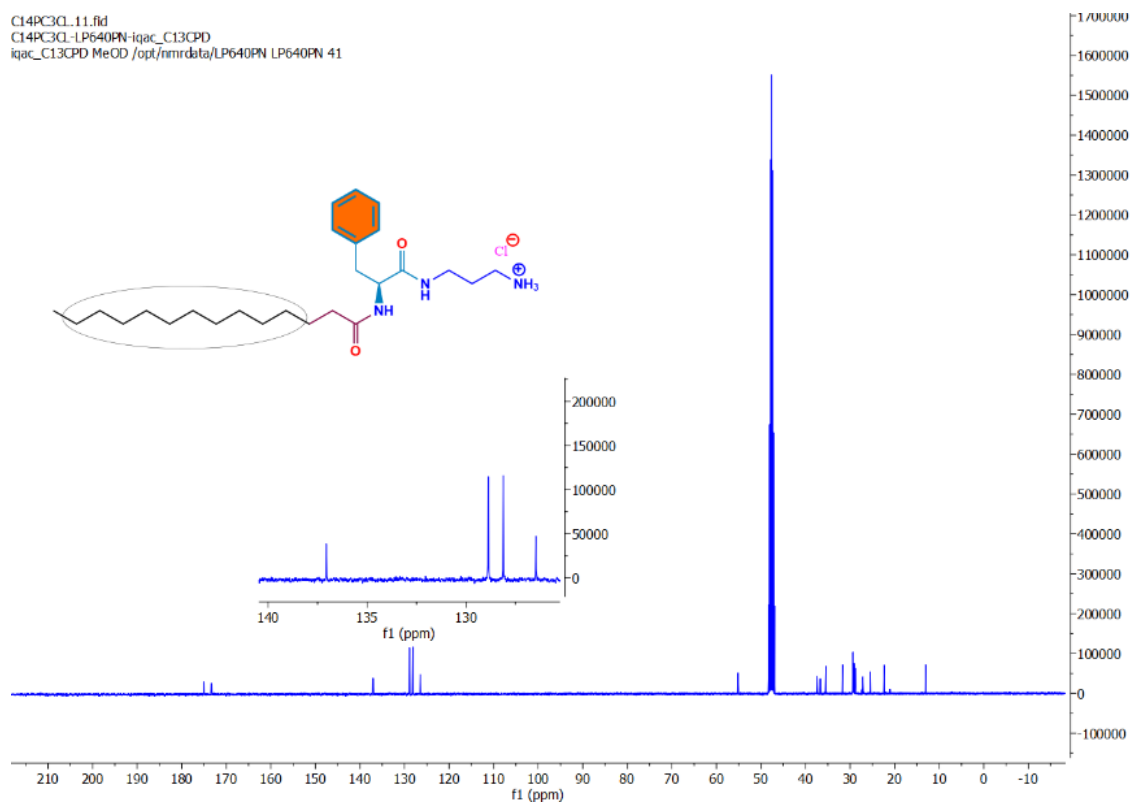

**Figure. S20:**  $^{13}\text{C}$  NMR spectrum of C<sub>14</sub>PC<sub>3</sub>NH<sub>3</sub>C



Lordes/TLIB

Lourdes\_C14PC3CL 9 (0.500) Cm (7:17)

1: TOF MS ES+  
5.08e6

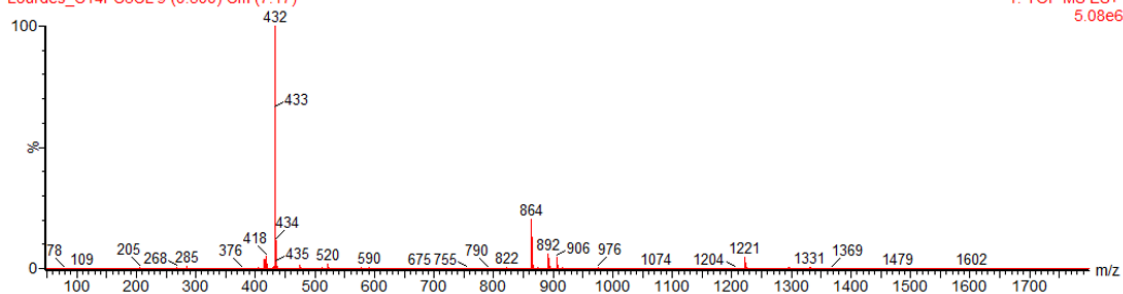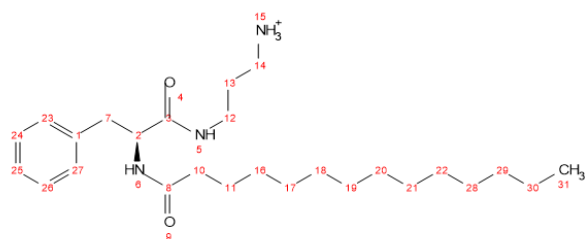

Chemical Formula: C<sub>26</sub>H<sub>46</sub>N<sub>3</sub>O<sub>2</sub><sup>+</sup>

Exact Mass: **432.36**

**Figure. S21:** ESI-MS spectrum of C<sub>14</sub>PC<sub>3</sub>NH<sub>3</sub>C

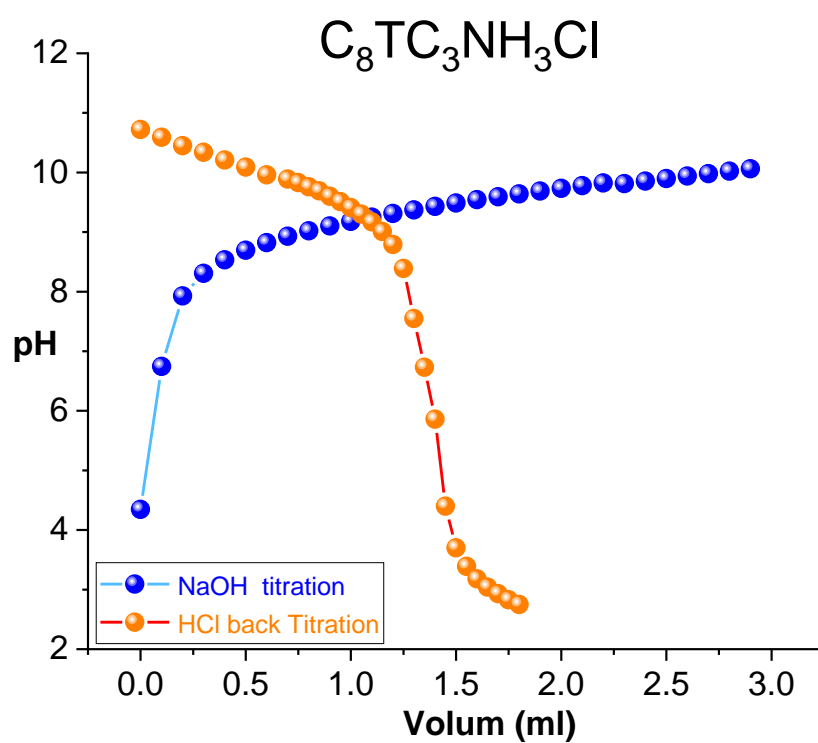

**Figure.S22** NaOH titration and HCl backtitration at 298.15 K for  $C_8TC_3NH_3Cl$

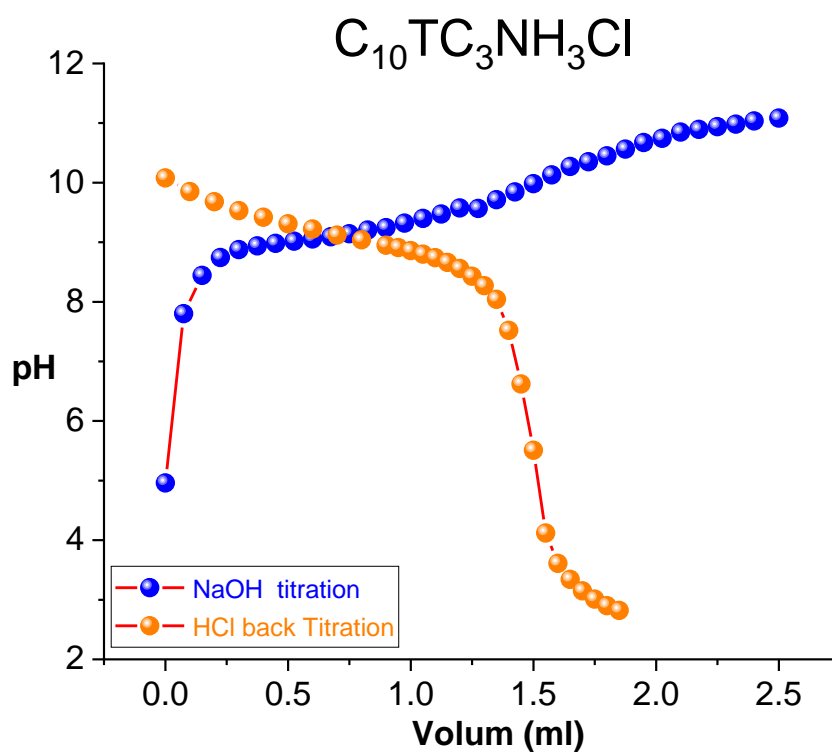

**Figure.S23** NaOH titration and HCl backtitration at 298.15 K for  $C_{10}TC_3NH_3Cl$

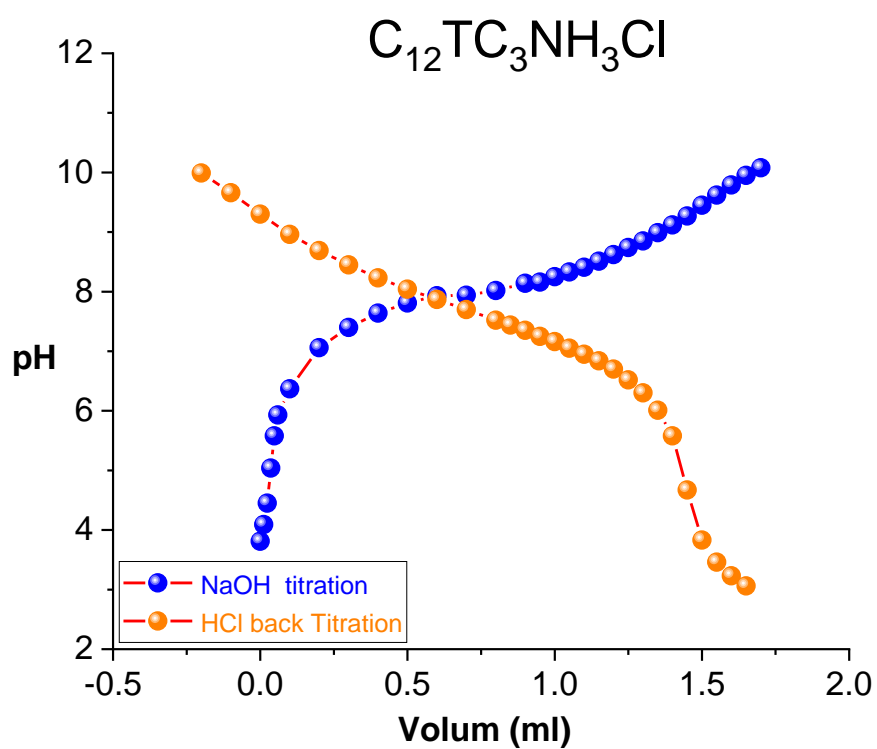

**Figure.S24** NaOH titration and HCl back titration at 298.15 K for  $C_{12}TC_3NH_3Cl$

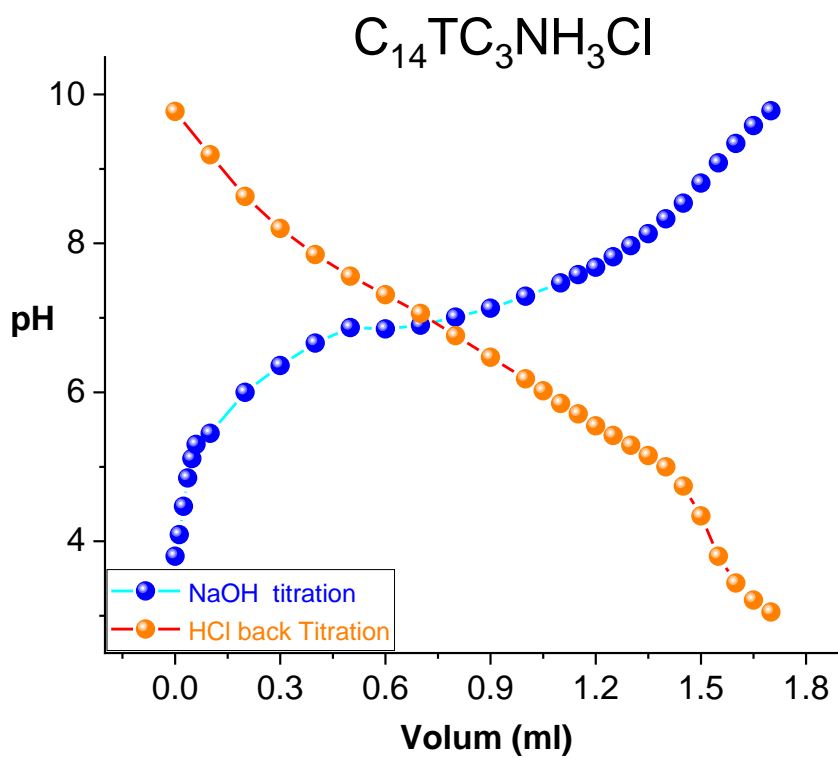

**Figure.S25** NaOH titration and HCl backtitration at 298.15 K for  $C_{14}TC_3NH_3Cl$

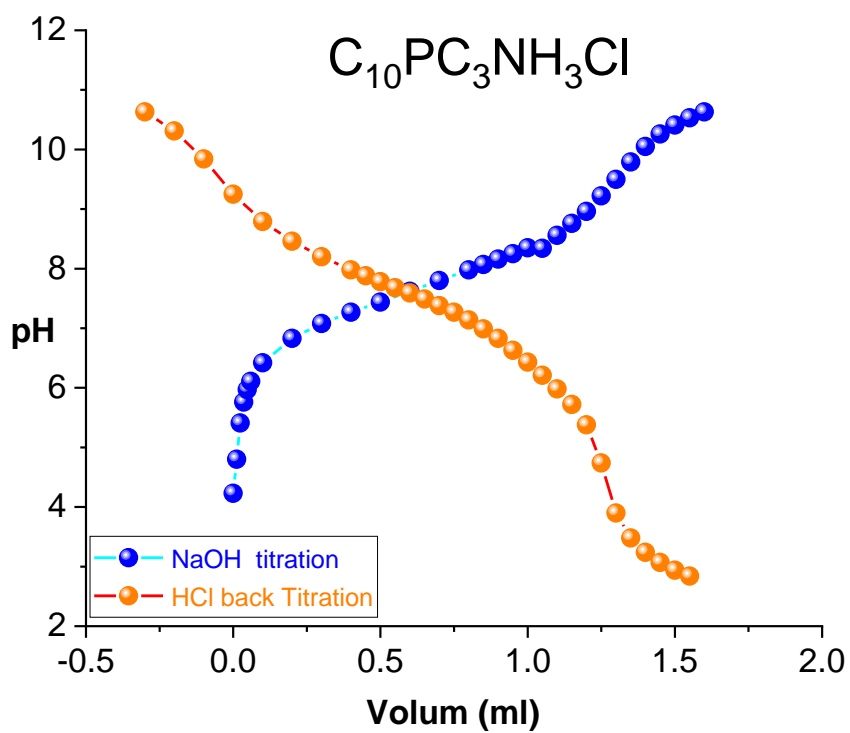

**Figure.S26** NaOH titration and HCl backtitration at 298.15 K for  $C_{10}PC_3NH_3Cl$

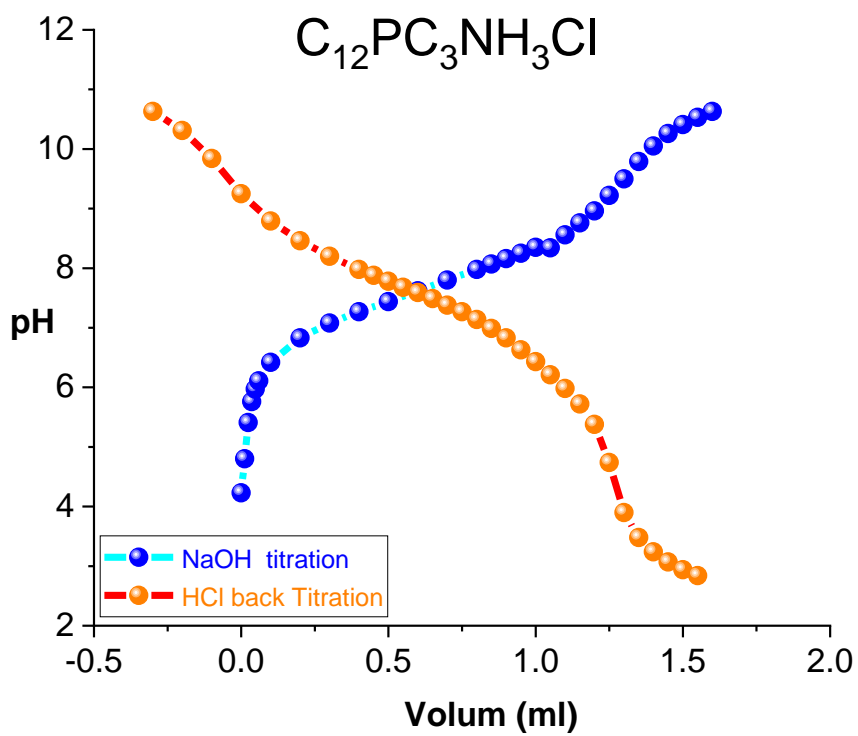

**Figure.S27** NaOH titration and HCl back titration at 298.15 K for  $C_{12}PC_3NH_3Cl$

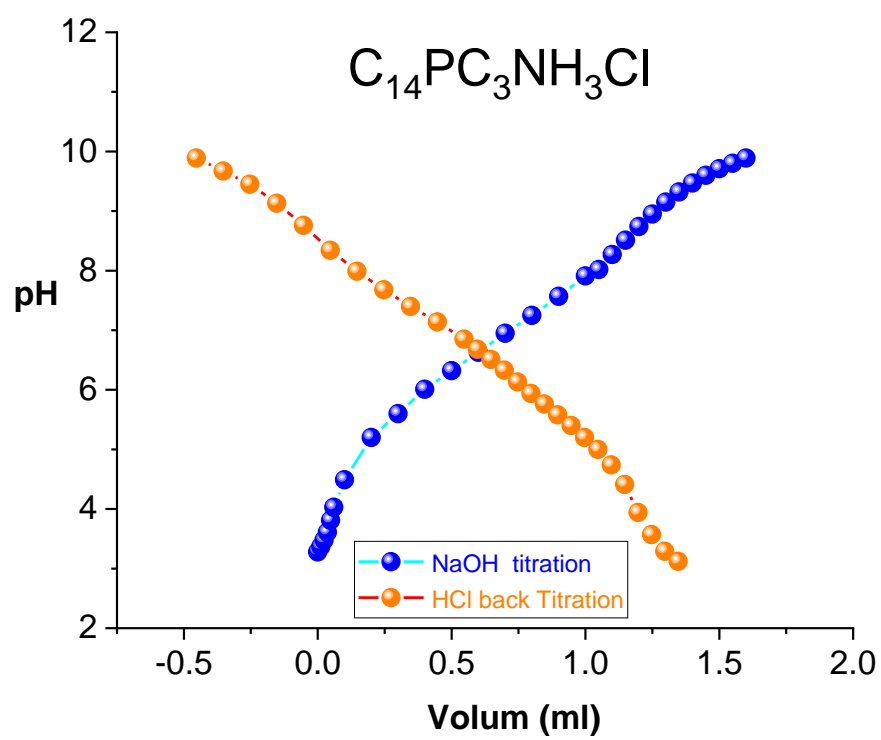

**Figure.S28** NaOH titration and HCl backtitration at 298.15 K for  $C_{14}PC_3NH_3Cl$

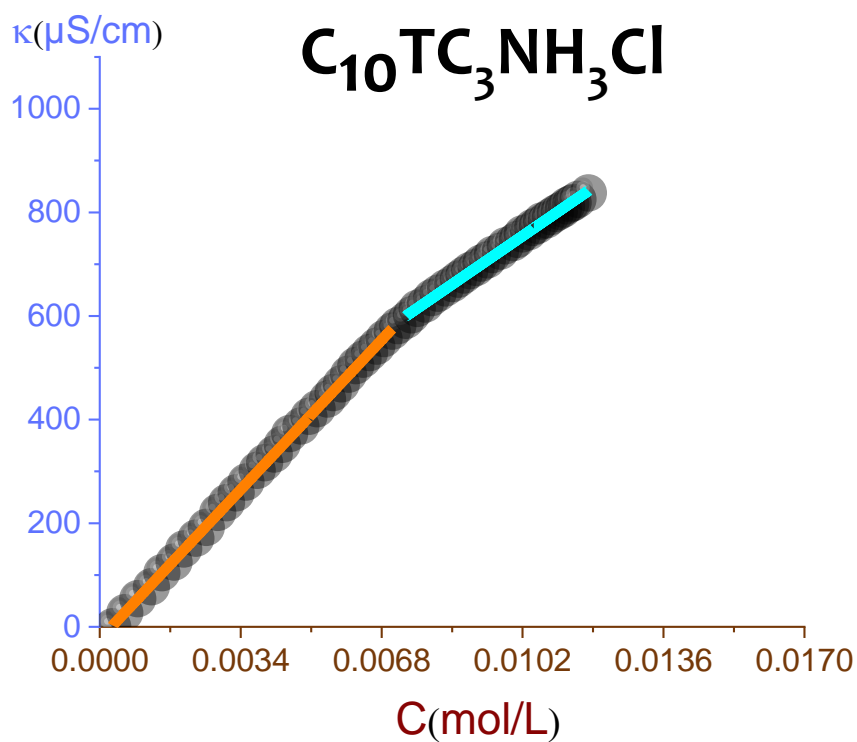

**Figure.S29** Specific conductivity ( $\kappa$ ) as a function of concentration of  $C_{10}TC_3NH_3Cl$

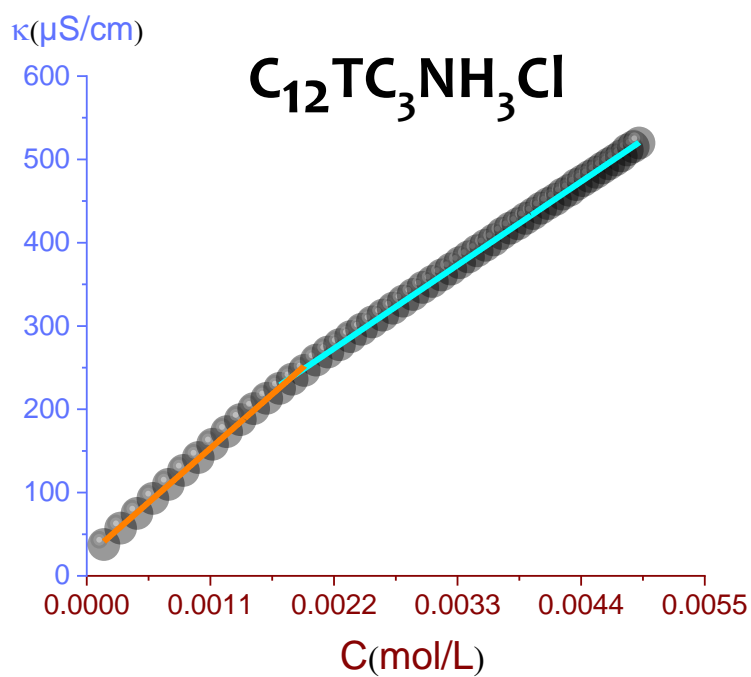

**Figure.S30** Specific conductivity ( $\kappa$ ) as a function of concentration of  $C_{12}TC_3NH_3Cl$

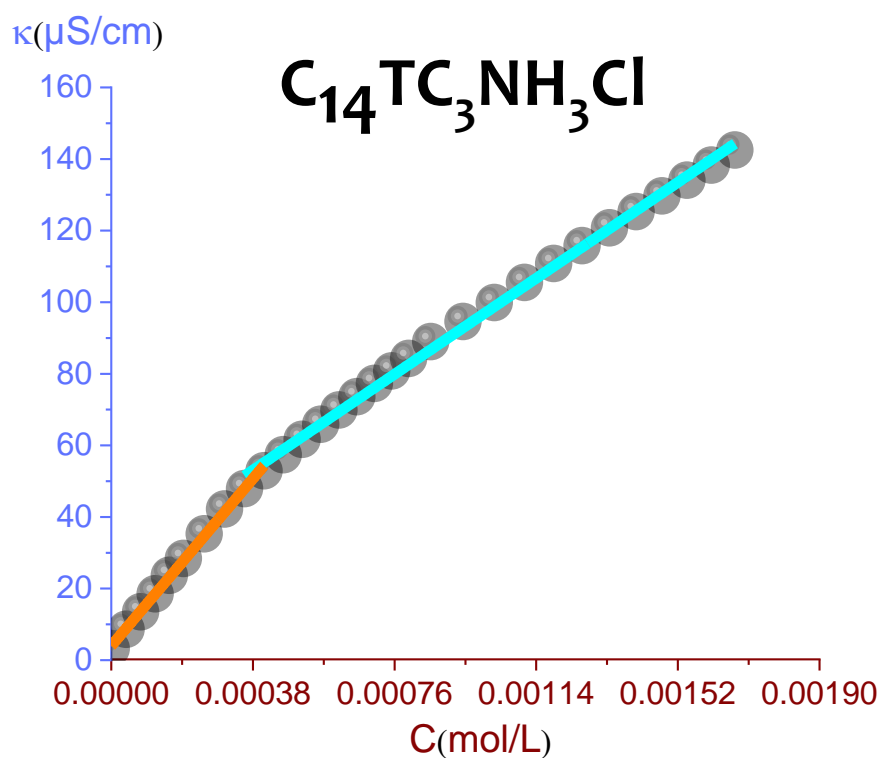

**Figure.S31** Specific conductivity ( $\kappa$ ) as a function of concentration of  $C_{14}TC_3NH_3Cl$

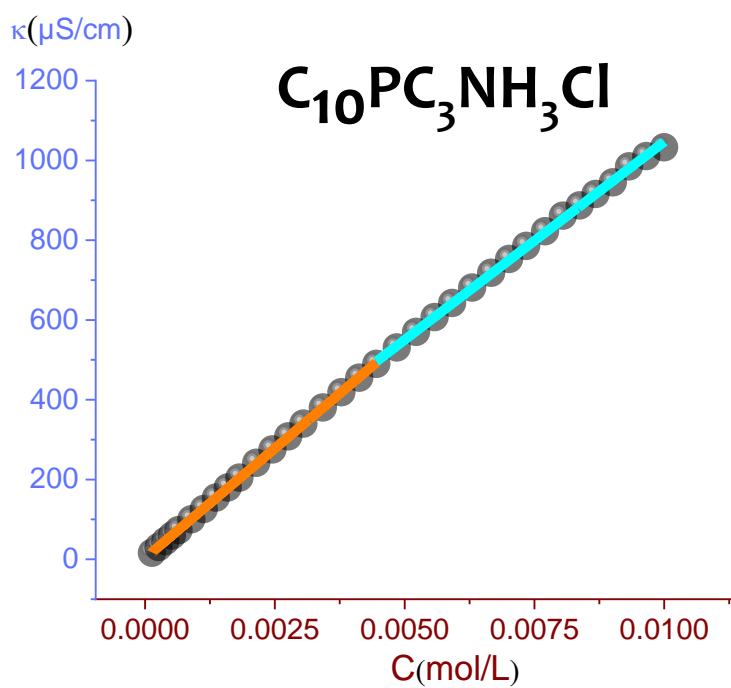

**Figure.S32** Specific conductivity ( $\kappa$ ) as a function of concentration of  $C_{10}PC_3NH_3Cl$

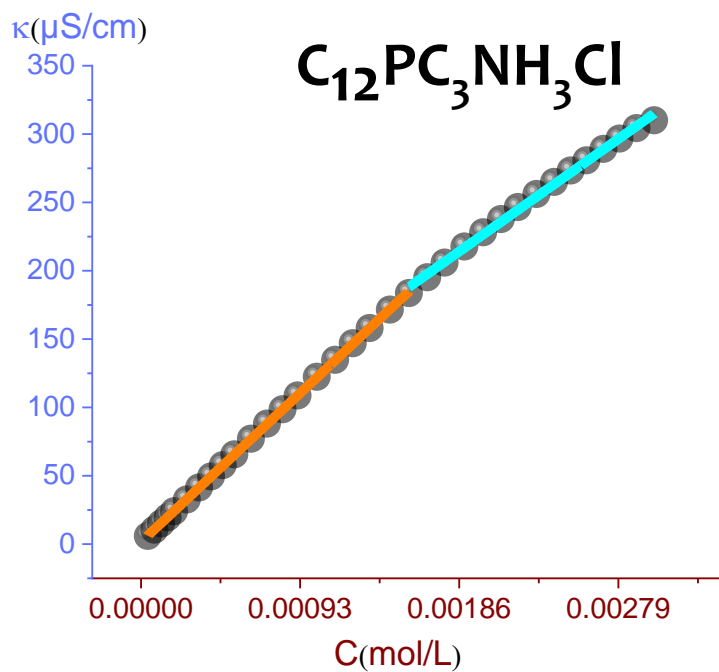

**Figure.S33** Specific conductivity ( $\kappa$ ) as a function of concentration of  $C_{12}PC_3NH_3Cl$

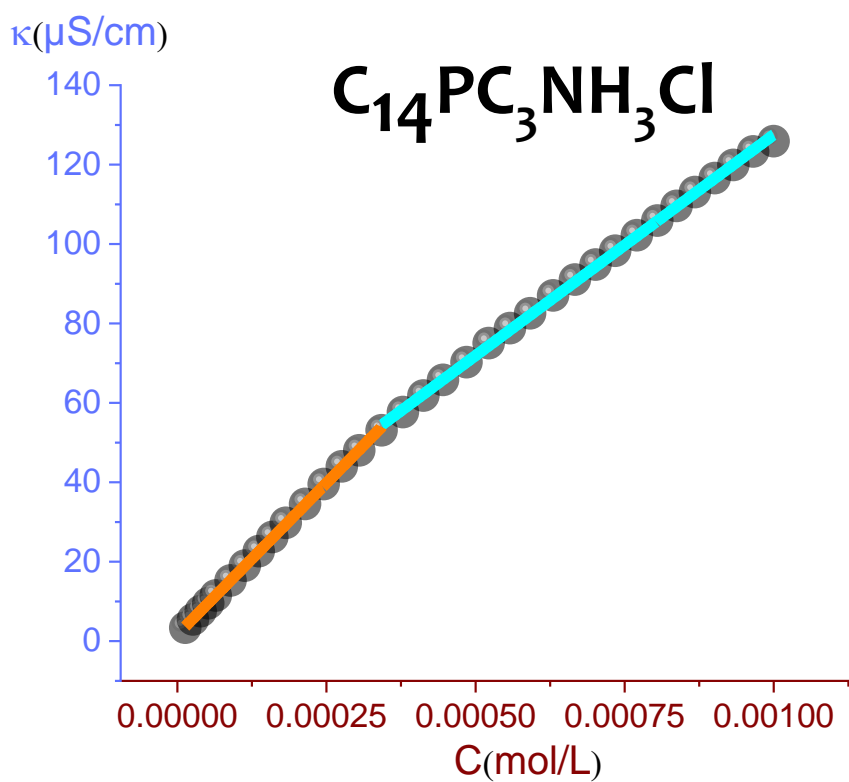

**Figure.S34** Specific conductivity ( $\kappa$ ) as a function of concentration of  $C_{14}PC_3NH_3Cl$



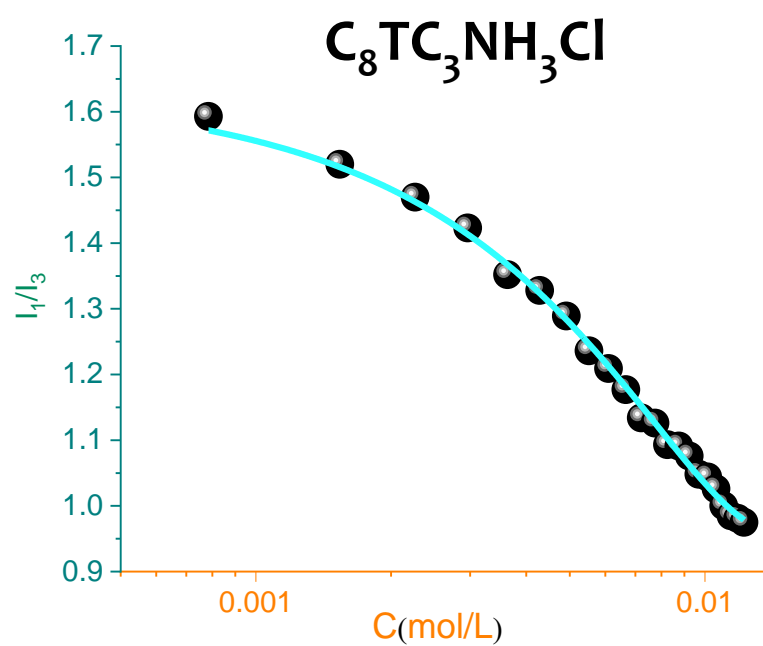

**Figure.S35** Variation of  $I_1/I_3$  ratio of pyrene fluorescence as a function of concentration  $C_8TC_3NH_3Cl$

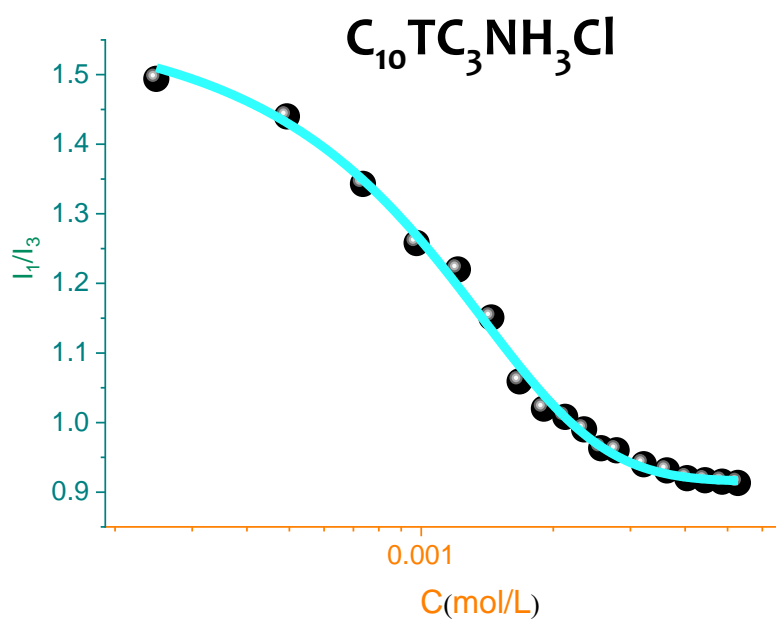

**Figure.S36** Variation of  $I_1/I_3$  ratio of pyrene fluorescence as a function of concentration  $C_{10}TC_3NH_3Cl$

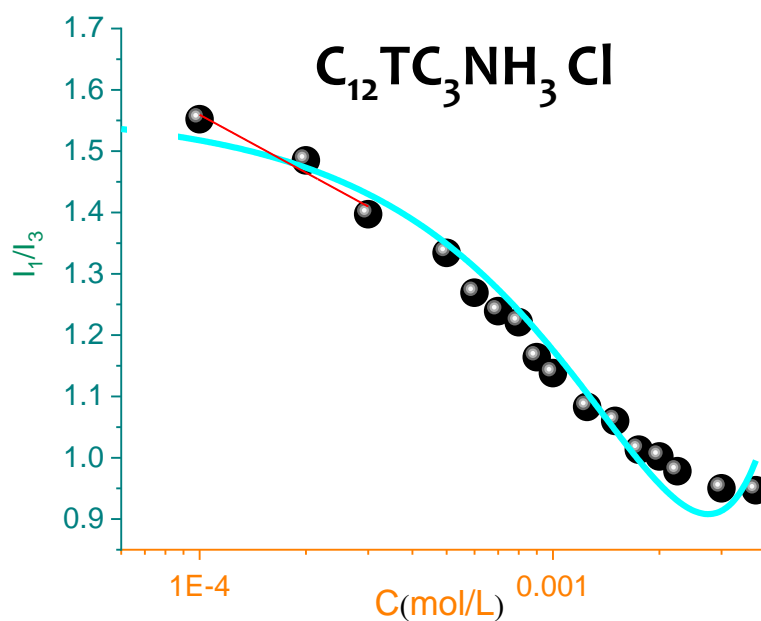

**Figure.S37** Variation of  $I_1/I_3$  ratio of pyrene fluorescence as a function of concentration  $C_{12}TC_3NH_3Cl$

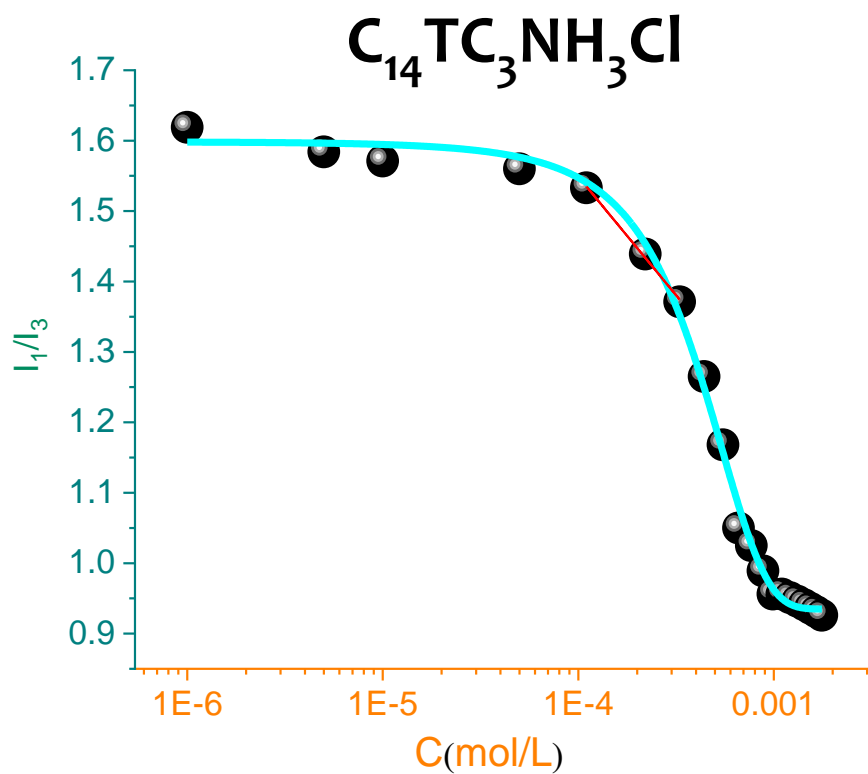

**Figure.S38** Variation of  $I_1/I_3$  ratio of pyrene fluorescence as a function of concentration  $C_{14}TC_3NH_3Cl$

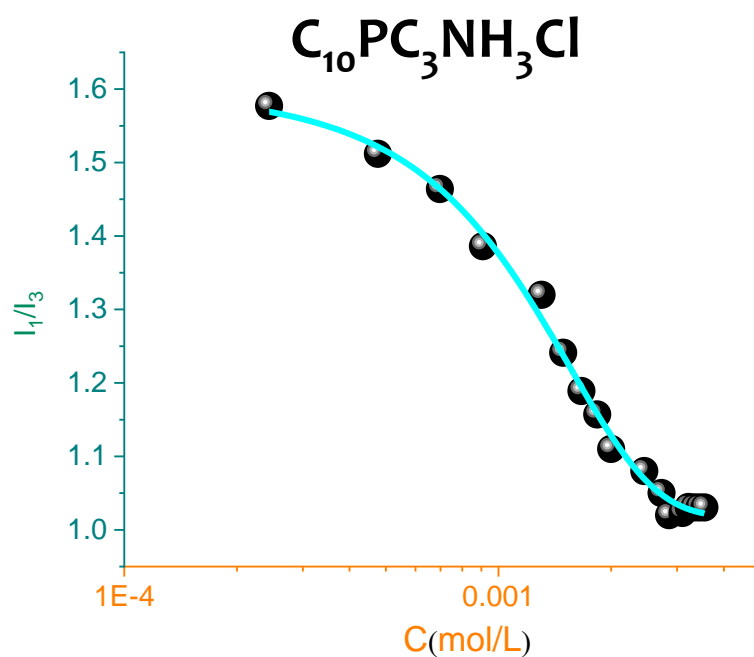

**Figure.S39** Variation of  $I_1/I_3$  ratio of pyrene fluorescence as a function of concentration  $C_{14}PC_3NH_3Cl$

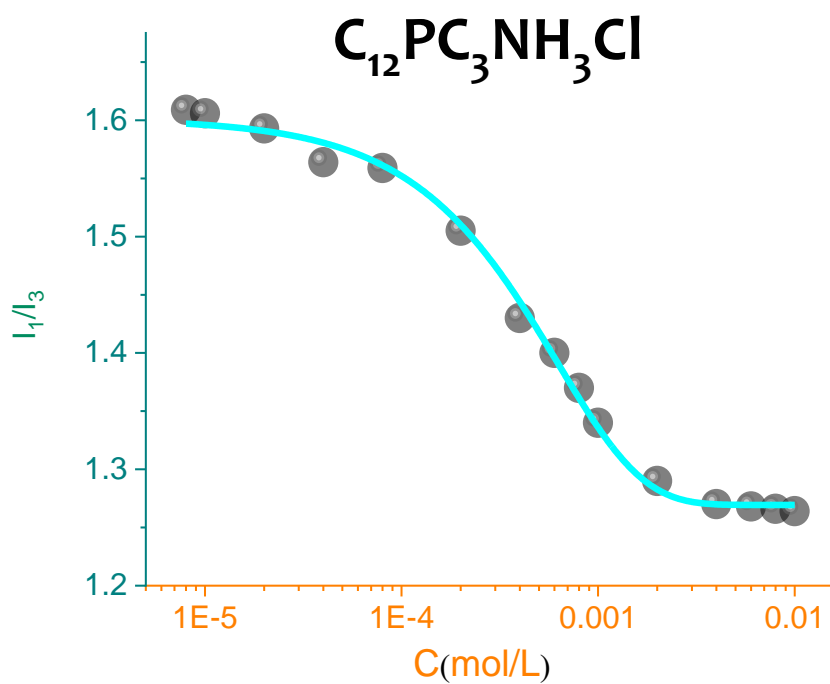

**Figure.S40** Variation of  $I_1/I_3$  ratio of pyrene fluorescence as a function of concentration  $C_{12}PC_3NH_3Cl$

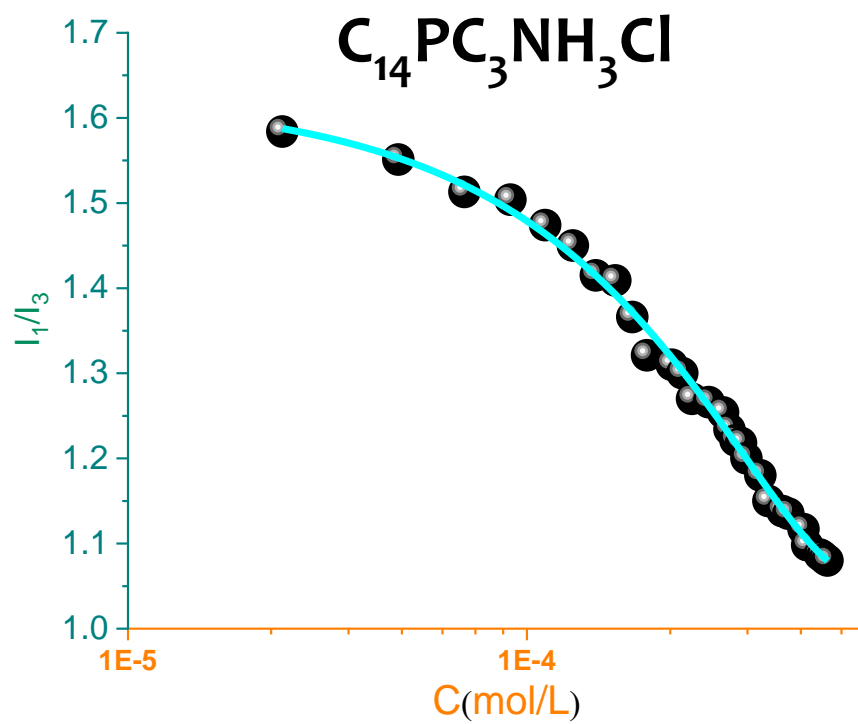

**Figure.S41** Variation of  $I_1/I_3$  ratio of pyrene fluorescence as a function of concentration  $C_{14}PC_3NH_3Cl$

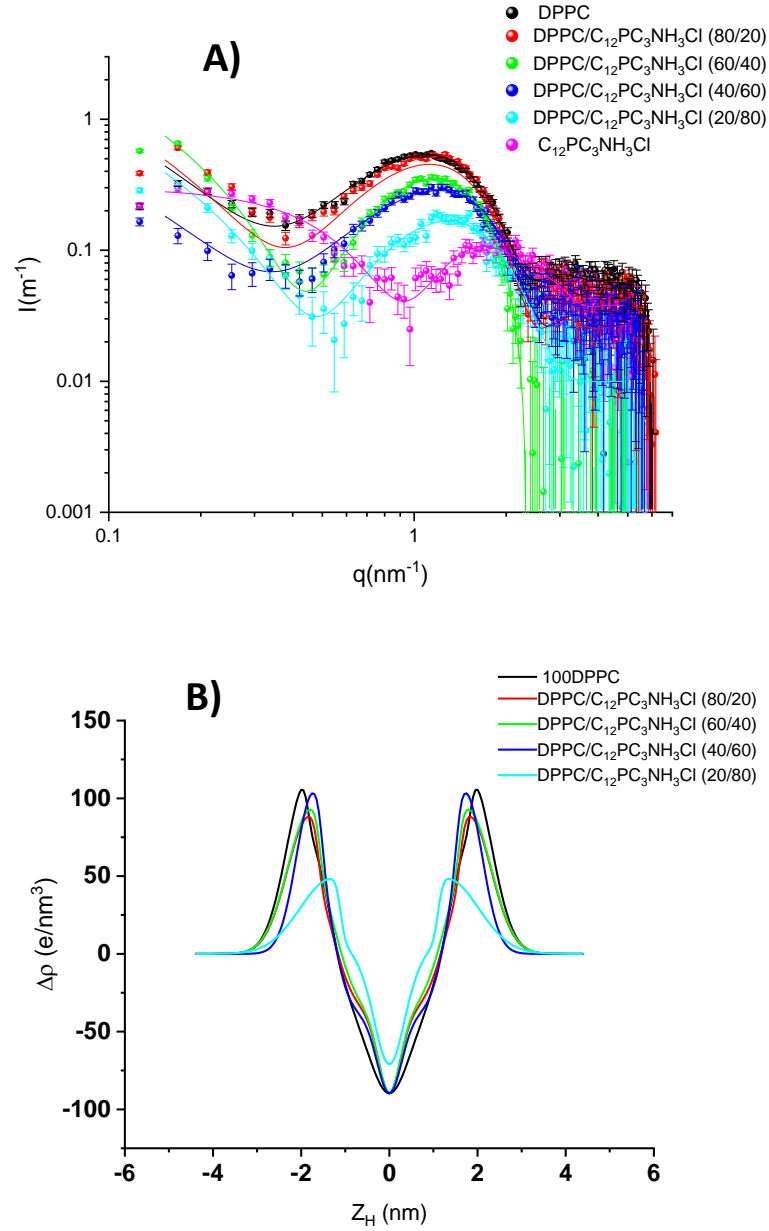

**Figure.S42** A) Scattered intensity patterns as a function of scattering vector modulus for DPPC and  $C_{12}PC_3NH_3Cl$  and their mixtures the curves correspond to the best fit of Gaussian bilayers or core-shell models. B) The corresponding electron density profiles of the bilayer models corresponding to the best fits of A).

**Table S1** Fitting parameters of Gaussian bilayers for DPPC/C<sub>12</sub>PC<sub>3</sub>NH<sub>3</sub>Cl mixtures.

|                                | DPPC/C <sub>12</sub> PC <sub>3</sub> NH <sub>3</sub> Cl |           |           |           |           |
|--------------------------------|---------------------------------------------------------|-----------|-----------|-----------|-----------|
|                                | DPPC                                                    | 80/20     | 60/40     | 40/60     | 20/80     |
| $\chi^2_{red}$                 | 1.19                                                    | 0.75      | 1.24      | 1.02      | 1.05      |
| $\sigma_h(\text{nm})$          | 0.47±0.05                                               | 0.50±0.05 | 0.52±0.05 | 0.38±0.05 | 0.71±0.05 |
| $\rho_h(\text{e}/\text{nm}^3)$ | 107±10                                                  | 87±10     | 92±10     | 103±10    | 47±5      |
| $Z_h(\text{nm})$               | 1.87±0.05                                               | 1.81±0.05 | 1.77±0.05 | 1.72±0.05 | 1.30±0.05 |
| $\sigma_c(\text{nm})$          | 0.43±0.10                                               | 0.26±0.10 | 0.26±0.10 | 0.28±0.10 | 0.31±0.10 |

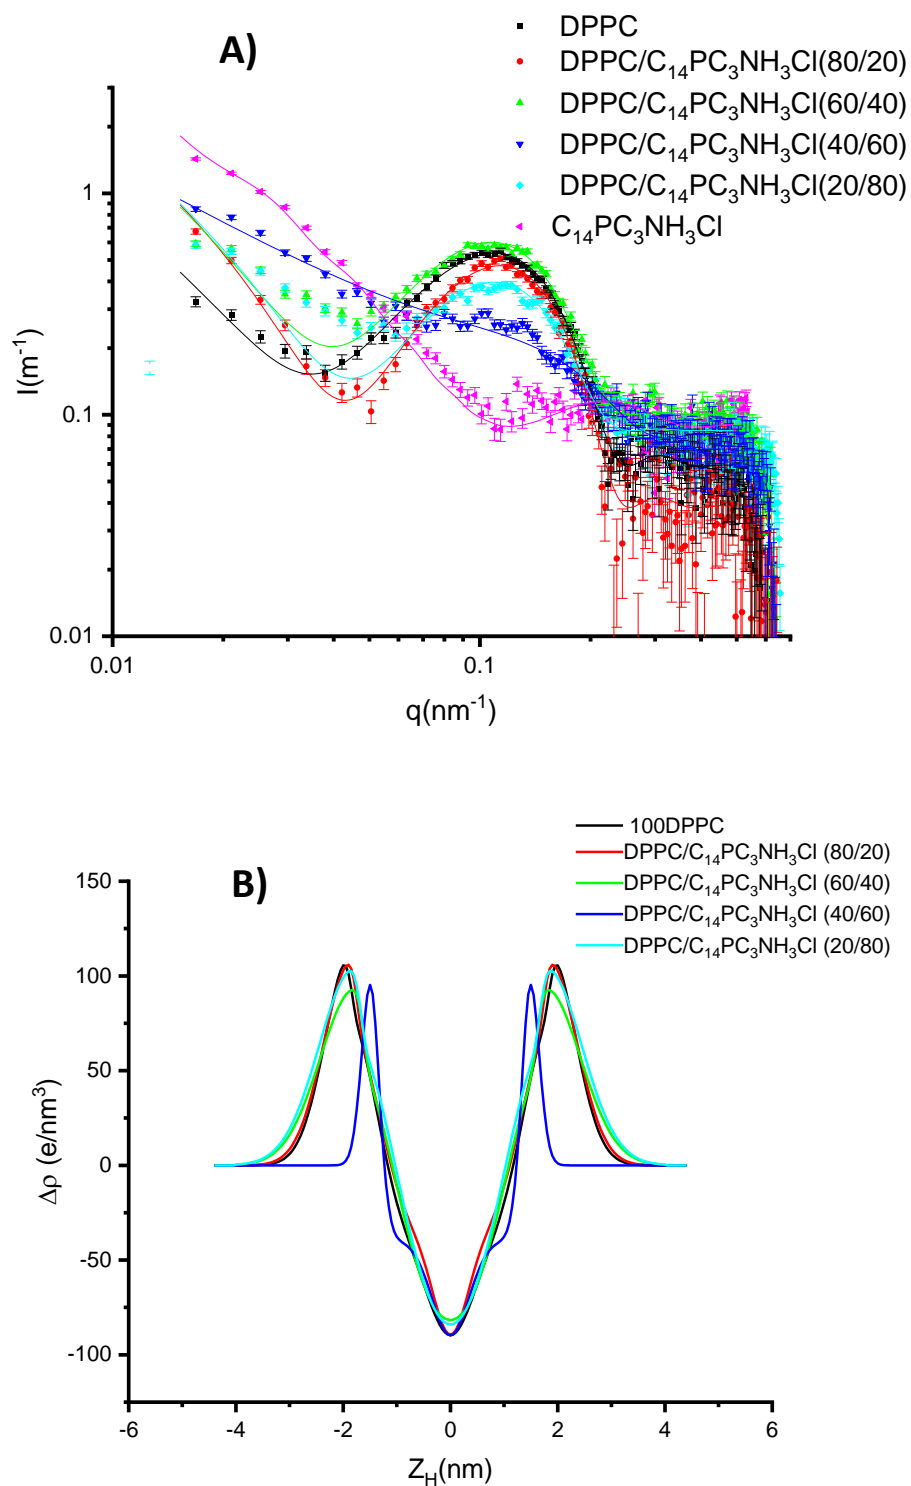

**Figure.S43** A) Scattered intensity patterns as a function of scattering vector modulus for DPPC and  $\text{C}_{14}\text{PC}_3\text{NH}_3\text{Cl}$  and their mixtures the curves correspond to the best fit of Gaussian bilayers or core-shell models. B) The corresponding electron density profiles of the bilayer models corresponding to the best fits of A).

**Table S2** Fitting parameters of Gaussian bilayers for DPPC/C<sub>14</sub>PC<sub>3</sub>NH<sub>3</sub>Cl mixtures.

|                                | DPPC/C <sub>14</sub> PC <sub>3</sub> NH <sub>3</sub> Cl |           |           |           |           |
|--------------------------------|---------------------------------------------------------|-----------|-----------|-----------|-----------|
|                                | DPPC                                                    | 80/20     | 60/40     | 40/60     | 20/80     |
| $\chi^2_{red}$                 | 1.19                                                    | 2.12      | 4.7       | 2.55      | 6.1       |
| $\sigma_h(\text{nm})$          | 0.47±0.01                                               | 0.52±0.01 | 0.67±0.02 | 0.17±0.01 | 0.66±0.03 |
| $\rho_h(\text{e}/\text{nm}^3)$ | 107±10                                                  | 107±13    | 103±15    | 99±12     | 105±15    |
| $Z_h(\text{nm})$               | 1.87±0.05                                               | 1.84±0.05 | 1.71±0.06 | 1.47±0.05 | 1.78±0.08 |
| $\sigma_c(\text{nm})$          | 0.43±0.05                                               | 0.31±0.05 | 0.99±0.10 | 0.35±0.05 | 0.69±0.10 |

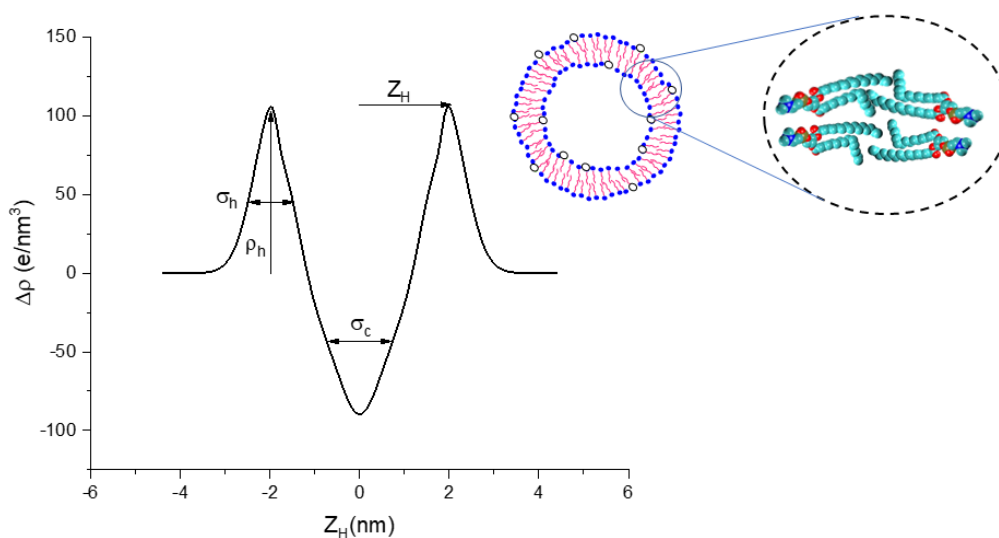

**Figure.S44.** Gaussian vesicle model

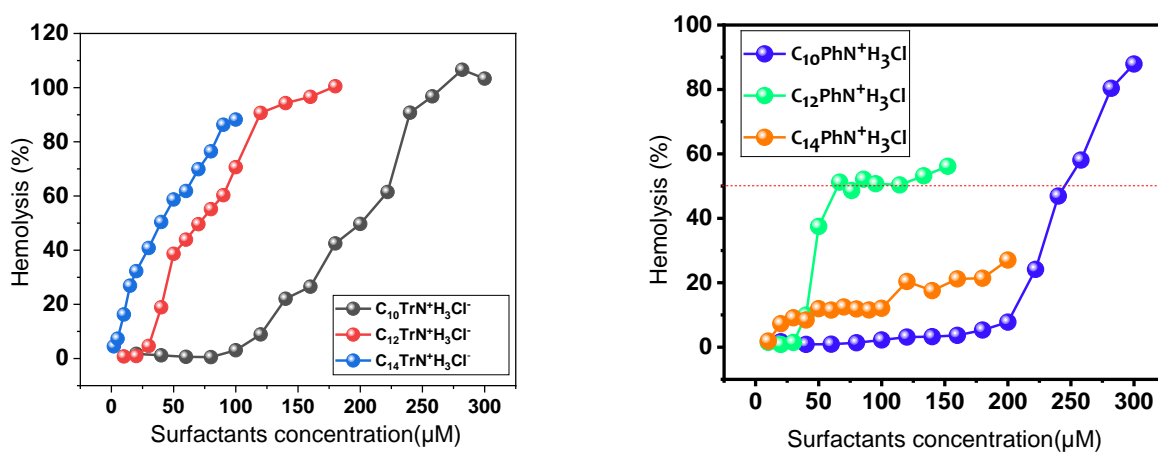

**Figure. S45.** Hemolysis (%) as a function of surfactants concentration.



**Table S3** Hemolytic activity of tryptophan and phenylalanine-based surfactants.

|                                                    | Hemolysis (HC <sub>50</sub> ) in $\mu$ M |
|----------------------------------------------------|------------------------------------------|
| C <sub>10</sub> TC <sub>3</sub> NH <sub>3</sub> Cl | 200.51                                   |
| C <sub>12</sub> TC <sub>3</sub> NH <sub>3</sub> Cl | 69.88                                    |
| C <sub>14</sub> TC <sub>3</sub> NH <sub>3</sub> Cl | 40.27                                    |
| C <sub>10</sub> PC <sub>3</sub> NH <sub>3</sub> Cl | 244.88                                   |
| C <sub>12</sub> PC <sub>3</sub> NH <sub>3</sub> Cl | 64.55                                    |
| C <sub>14</sub> PC <sub>3</sub> NH <sub>3</sub> Cl | Not Hemolytic                            |

**Table S4** Results of the interaction details and docking score in (kcal/mol) of C<sub>n</sub>Benzalkonium derivative (From C<sub>8</sub> to C<sub>14</sub> carbon atoms) against the peptidoglycan glycosyltransferase (PDB ID:2OQO).

| Inhibitors                   | Score<br>Kcal/mol | Ligand   | Receptor | Interactions  |                      | Distance<br>Å |
|------------------------------|-------------------|----------|----------|---------------|----------------------|---------------|
|                              |                   |          |          | Categories    | Types                |               |
| C <sub>8</sub> Benzalkonium  | -5.9              | Ring(C6) | ARG225   | Hydrophobic   | Pi-Alkyl             | 5.0856        |
|                              |                   | Ring(C6) | ALA141   | Hydrophobic   | Pi-Sigma             | 3.52615       |
| C <sub>10</sub> Benzalkonium | -5.8              | Ring(C6) | ILE93    | Hydrophobic   | Pi-Alkyl             | 5.3345        |
|                              |                   | Ring(C6) | ILE138   | Hydrophobic   | Pi-Alkyl             | 5.14622       |
|                              |                   | Ring(C6) | LEU142   | Hydrophobic   | Pi-Alkyl             | 5.4331        |
|                              |                   | C(CH2)   | GLY114   | Hydrogen Bond | Carbon Hydrogen Bond | 2.82665       |
|                              |                   | C(CH2)   | GLN113   | Hydrogen Bond | Carbon Hydrogen Bond | 3.39365       |
| C <sub>12</sub> Benzalkonium | -7.2              | C(CH3)   | THR82    | Hydrogen Bond | Carbon Hydrogen Bond | 3.34222       |
|                              |                   | C(CH3)   | GLU83    | Hydrogen Bond | Carbon Hydrogen Bond | 2.99631       |
|                              |                   | Ring(C6) | ASP84    | Hydrophobic   | Pi-Sigma             | 3.91375       |
|                              |                   | Ring(C6) | ALA97    | Hydrophobic   | Pi-Sigma             | 3.50131       |
|                              |                   | C(CH2)   | GLY114   | Hydrogen Bond | Carbon Hydrogen Bond | 2.77969       |
|                              |                   | C(CH2)   | GLN113   | Hydrogen Bond | Carbon Hydrogen Bond | 3.37694       |
|                              |                   | C(CH3)   | THR82    | Hydrogen Bond | Carbon Hydrogen Bond | 3.28951       |
| C <sub>14</sub> Benzalkonium | -7.4              | C(CH3)   | GLU83    | Hydrogen Bond | Carbon Hydrogen Bond | 3.02791       |
|                              |                   | Ring(C6) | ASP84    | Hydrophobic   | Pi-Sigma             | 3.91929       |
|                              |                   | Ring(C6) | ALA97    | Hydrophobic   | Pi-Sigma             | 3.51456       |

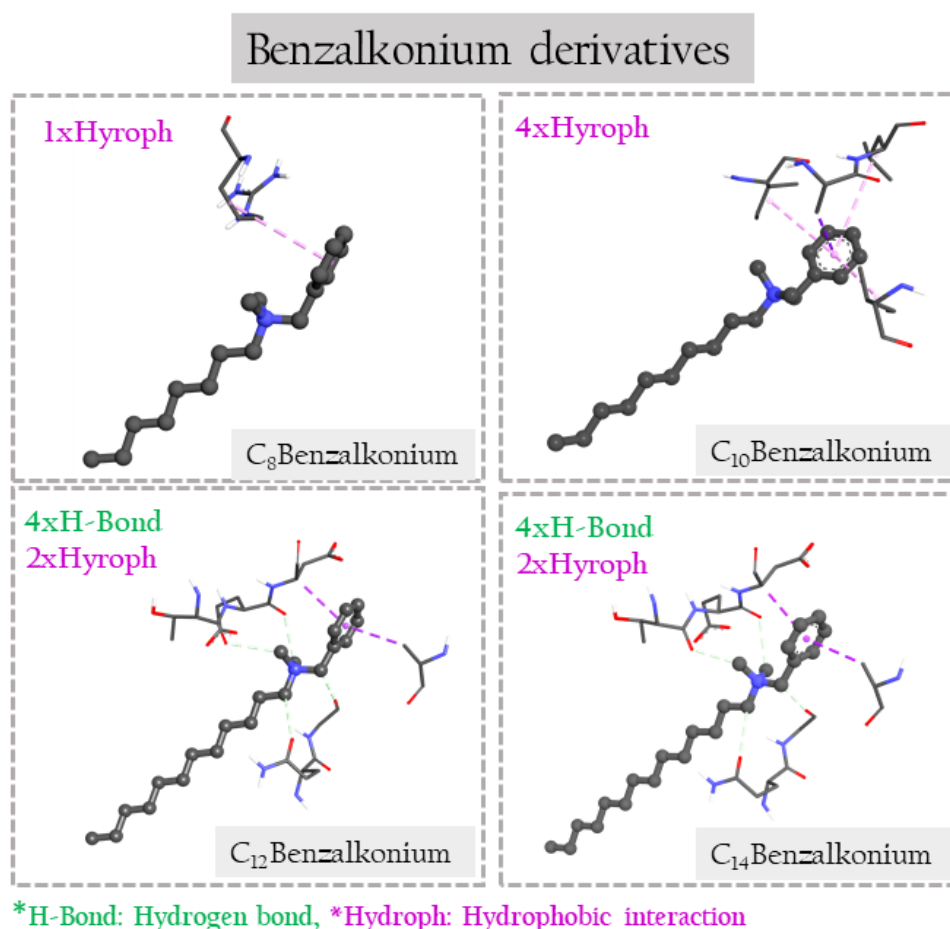

**Figure S46:** Three-dimensional (3 D) closest interactions between active site residues of peptidoglycan glycosyltransferase (PDB ID:2OQO) With CnBenzalkonium (From C<sub>8</sub> to C<sub>14</sub> carbon atoms) derivatives
